# Supplementary material
Source: PubMed Central journal article supplement (PMC4975513)
Supplement: NIHMS31483-supplement-1.pdf [file NIHMS31483-supplement-1.pdf]

## Supplementary Information

### **Genome-wide association analyses identifies a susceptibility locus for tuberculosis on chromosome 18q11.2**

The African TB Genetics Consortium and the Wellcome Trust Case Control Consortium

The authors of this paper are: Thorsten Thye\*, Fredrik O. Vannberg\*, Sunny H. Wong, Ellis Owusu-Dabo, Ivy Osei, John Gyapong, Giorgio Sirugo, Fatou Sisay-Joof, Anthony Enimil, Margaret A. Chinbuah, Sian Floyd, David K. Warndorff, Lifted Sichali, Simon Malema, Amelia C. Crampin, Bagrey Ngwira, Yik Y. Teo, Kerrin Small, Kirk Rockett, Dominic Kwiatkowski, Paul E. Fine, Philip C. Hill, Melanie Newport, Christian Lienhardt, Richard A. Adegbola, Tumani Corrah, Andreas Ziegler, African TB Genetics Consortium, Wellcome Trust Case Control Consortium, Andrew P. Morris, Christian G. Meyer, Rolf D. Horstmann, Adrian V.S. Hill

\* Dr Thorsten Thye and Dr Fredrik O. Vannberg contributed equally to this work

Correspondence should be addressed to Dr Rolf D. Horstmann (horstmann@bnitm.de) and Dr Adrian V.S. Hill (adrian.hill@well.ox.ac.uk)

## **Genome-wide association analyses identifies a susceptibility locus for tuberculosis on chromosome 18q11.2**

### **Contents:**

Supplementary Note (p.3-7)

Supplementary Fig. 1 (p.8)

Supplementary Table 1 (p.9)

Supplementary Table 2 (p.10)

Supplementary Table 3 (p.11)

Supplementary Table 4 (p.12-14)

Supplementary Table 5 (p.15)

Supplementary Methods (p.16-31)

## Supplementary Note

### The membership of the African TB Genetics Consortium is:

**Germany: (Hamburg & Lübeck)** Christian G Meyer<sup>1</sup>, Thorsten Thye<sup>1,2</sup>, Andreas Ziegler<sup>2</sup>, Rolf D Horstmann<sup>2</sup>

**Ghana: (Kumasi)** Anthony Enimil<sup>3,4</sup>, Ellis Owusu-Dabo<sup>3,5</sup>; **(Accra)** Margaret A. Chinbuah<sup>6</sup>, John Gyapong<sup>6</sup>, Ivy Osei<sup>6</sup>

**Guinea-Bissau: (Bandim)** Peter Aaby<sup>7</sup>, Per Gustafson<sup>7</sup>, Ida M Lisse<sup>7</sup>

**Guinea: (Conakry)** Baboucar Bah<sup>8</sup>, Oumou Bah-Sow<sup>8</sup>

**Malawi: (Karonga)** Amelia C Crampin<sup>9</sup>, Simon Malema<sup>10</sup>, Bagrey Ngwira<sup>10</sup>, Lifted Sichali<sup>10</sup>, David K Warndorff<sup>9</sup>

**The Gambia: (Banjul)** Richard A Adegbola<sup>11</sup>, Tumani Corrah<sup>11</sup>, Bouke deJong<sup>11</sup>, Philip C Hill<sup>11</sup>, Christian Lienhardt<sup>11</sup>, Keith P. McAdam<sup>11</sup>, Melanie Newport<sup>11</sup>, Jackson Sillah<sup>11</sup>, Giorgio Sirugo<sup>11</sup>, Fatou Sisay-Joof<sup>11</sup>

**United Kingdom: (Oxford)** Fredrik O. Vannberg<sup>12</sup>, Sunny H. Wong<sup>12</sup>, Emily Lyons<sup>12</sup>, Sophie Roetynk<sup>12</sup>, Andrew P. Morris<sup>12</sup>, Adrian V.S. Hill<sup>12</sup>; **(London)** Sian Floyd<sup>9</sup>, Paul E. Fine<sup>9</sup>

### Affiliation

1. Department of Molecular Medicine, Bernhard Nocht Institute for Tropical Medicine, Hamburg, Germany; 2. Institute of Medical Biometry and Statistics, University Hospital Schleswig-Holstein, Campus Lübeck, Lübeck, Germany; 3. Kumasi Centre for Collaborative Research in Tropical Medicine, Kumasi, Ghana; 4. Komfo Anokye Teaching Hospital, Kumasi, Ghana; 5. Department of Community Health, College of Health Sciences, Kwame Nkrumah University of Science and Technology, Kumasi, Ghana; 6. Health Research Unit, Ghana Health Service, Accra, Ghana; 7. Bandim Health Project, Apartado 861, Bissau, Guinea-Bissau; 8. Service de Pneumo-Phtisiologie, University Ignace Deen, Conakry, BP 634, Republic of Guinea; 9. London School of Hygiene and Tropical Medicine, London, United Kingdom; 10. Karonga Prevention Study, Chilumba, Karonga District, Malawi; 11. MRC Laboratories, Fajara, Banjul, The Gambia; 12. Wellcome Trust Centre for Human Genetics, University of Oxford, United Kingdom.

**The membership of The Wellcome Trust Case Control Consortium is:**

**Tuberculosis (Gambia):** Richard A Adegbola<sup>1</sup>, Philip C Hill<sup>1</sup>, Keith P. McAdam<sup>1</sup>, Melanie Newport<sup>1</sup>, Giorgio Sirugo<sup>1</sup>; **(Oxford):** Emily Lyons<sup>2</sup>, Sophie Roetynk<sup>2</sup>, Fredrik Vannberg<sup>2</sup>, Sunny H Wong<sup>2</sup>, Adrian V S Hill<sup>2</sup>

**Tuberculosis Statistical Analysis Group (Oxford)** Taane G Clark<sup>2</sup>, Peter Donnelly<sup>2</sup>, Emily Lyons<sup>2</sup>, Jonathan L Marchini<sup>2</sup> Kerrin Small<sup>2</sup>, Fredrik O Vannberg<sup>2</sup>, Yik Ying Teo<sup>2</sup>, Andrew P Morris<sup>2</sup>

**Gambian Controls (Gambia):** David J Conway<sup>1</sup> Muminatou Jallow<sup>1</sup>, Melanie Newport<sup>1</sup>, Giorgio Sirugo<sup>1</sup>; **(Oxford):** Kirk A Rockett<sup>2</sup>, Dominic P Kwiatkowski<sup>2,6</sup>

**DNA, Genotyping, Data QC and Informatics (Wellcome Trust Sanger Institute, Hinxton):** Claire Bryan<sup>6</sup>, Suzannah J Bumpstead<sup>6</sup>, Amy Chaney<sup>6</sup>, Kate Downes<sup>4,6</sup>, Jilur Ghorri<sup>6</sup>, Rhian Gwilliam<sup>6</sup>, Sarah E Hunt<sup>6</sup>, Michael Inouye<sup>6</sup>, Andrew Keniry<sup>6</sup>, Emma King<sup>6</sup>, Ralph McGinnis<sup>6</sup>, Simon Potter<sup>6</sup>, Rathi Ravindrarajah<sup>6</sup>, Pamela Whittaker<sup>6</sup>, David Withers<sup>6</sup>, Panos Deloukas<sup>6</sup>; **(Cambridge):** Hin-Tak Leung<sup>4</sup>, Sarah Nutland<sup>4</sup>, Helen E Stevens<sup>4</sup>, Neil M Walker<sup>4</sup>, John ATodd<sup>4</sup>

**Statistics (Cambridge):** Doug Easton<sup>12</sup>, David G Clayton<sup>4</sup>; **(Leicester):** Paul R Burton<sup>3</sup>, Martin D Tobin<sup>3</sup>; **(Oxford):** Jeffrey C Barrett<sup>2</sup>, David Evans<sup>2</sup>, Andrew P Morris<sup>2</sup>, Lon R Cardon<sup>2</sup>; **(Oxford):** Niall J Cardin<sup>11</sup>, Dan Davison<sup>11</sup>, Teresa Ferreira<sup>11</sup>, Joanne Pereira-Gale<sup>11</sup>, Ingeleif B Hallgrimsdóttir<sup>11</sup>, Bryan N Howie<sup>11</sup>, Jonathan L Marchini<sup>2,11</sup>, Chris CA Spencer<sup>11</sup>, Zhan Su<sup>11</sup>, Yik Ying Teo<sup>2,11</sup>, Damjan Vukcevic<sup>11</sup>, Peter Donnelly<sup>2,11</sup>

**Management Committee:** Paul R Burton<sup>3</sup>, David G Clayton<sup>4</sup>, Lon R Cardon<sup>2</sup>, Nick Craddock<sup>5</sup>, Panos Deloukas<sup>6</sup>, Audrey Duncanson<sup>7</sup>, Dominic P Kwiatkowski<sup>2,6</sup>, Mark I McCarthy<sup>2,8</sup>, Willem H Ouwehand<sup>9</sup>, Nilesh J Samani<sup>10</sup>, John A Todd<sup>4</sup>, Peter Donnelly (Chair)<sup>2</sup>

**Analysis Committee:** Jeffrey C Barrett<sup>2</sup>, Paul R Burton<sup>3</sup>, Dan Davison<sup>11</sup>, Peter Donnelly<sup>2,11</sup>, Doug Easton<sup>12</sup>, David Evans<sup>4</sup>, Hin-Tak Leung<sup>4</sup>, Jonathan L Marchini<sup>2,11</sup>, Andrew P Morris<sup>2</sup>, Chris CA Spencer<sup>11</sup>, Martin D Tobin<sup>3</sup>, Lon R Cardon (Co-chair)<sup>2</sup>, David G Clayton (Co-chair)<sup>4</sup>

**UK Blood Services & University of Cambridge Controls:** Antony P Attwood<sup>6,9</sup>, James P Boorman<sup>9</sup>, Barbara Cant<sup>9</sup>, Ursula Everson<sup>13</sup>, Judith M Hussey<sup>14</sup>, Jennifer D Jolley<sup>9</sup>, Alexandra S Knight<sup>9</sup>, Kerstin Koch<sup>9</sup>, Elizabeth Meech<sup>15</sup>, Sarah Nutland<sup>4</sup>, Christopher V Prowse<sup>16</sup>, Helen E Stevens<sup>4</sup>, Niall C Taylor<sup>9</sup>, Graham R Walters<sup>17</sup>, Neil M Walker<sup>4</sup>, Nicholas A Watkins<sup>9</sup>, Thilo Winzer<sup>9</sup>, John A Todd<sup>4</sup>, Willem H Ouwehand<sup>9</sup>

**1958 Birth Cohort Controls:** Richard W Jones<sup>18</sup>, Wendy L McArdle<sup>18</sup>, Susan M Ring<sup>18</sup>, David P Strachan<sup>19</sup>, Marcus Pembrey<sup>18,20</sup>

**Bipolar Disorder (Aberdeen):** Gerome Breen<sup>21</sup>, David St Clair<sup>21</sup>; **(Birmingham):** Sian Caesar<sup>22</sup>, Katharine Gordon-Smith<sup>22,23</sup>, Lisa Jones<sup>22</sup>; **(Cardiff):** Christine Fraser<sup>23</sup>, Elaine K Green<sup>23</sup>, Detelina Grozeva<sup>23</sup>, Marian L Hamshere<sup>23</sup>, Peter A Holmans<sup>23</sup>, Ian R Jones<sup>23</sup>, George Kirov<sup>23</sup>, Valentina Moskvina<sup>23</sup>, Ivan Nikolov<sup>23</sup>, Michael C O'Donovan<sup>23</sup>, Michael J Owen<sup>23</sup>, Nick Craddock<sup>23</sup>; **(London):** David A Collier<sup>24</sup>, Amanda Elkin<sup>24</sup>, Anne Farmer<sup>24</sup>, Richard Williamson<sup>24</sup>, Peter McGuffin<sup>24</sup>; **(Newcastle):** Allan H Young<sup>25</sup>, I Nicol Ferrier<sup>25</sup>

**Coronary Artery Disease (Leeds):** Stephen G Ball<sup>26</sup>, Anthony J Balmforth<sup>26</sup>, Jennifer H Barrett<sup>26</sup>, D Timothy Bishop<sup>26</sup>, Mark M Iles<sup>26</sup>, Azhar Maqbool<sup>26</sup>, Nadira Yuldasheva<sup>26</sup>, Alistair S Hall<sup>26</sup>; **(Leicester):** Peter S Braund<sup>10</sup>, Paul R Burton<sup>3</sup>, Richard J Dixon<sup>10</sup>, Massimo Mangino<sup>10</sup>, Suzanne Stevens<sup>10</sup>, Martin D Tobin<sup>3</sup>, John R Thompson<sup>3</sup>, Nilesh J Samani<sup>10</sup>

**Crohn's Disease (Cambridge):** Francesca Bredin<sup>27</sup>, Mark Tremelling<sup>27</sup>, Miles Parkes<sup>27</sup>;

**(Edinburgh):** Hazel Drummond<sup>28</sup>, Charles W Lees<sup>28</sup>, Elaine R Nimmo<sup>28</sup>, Jack Satsangi<sup>28</sup>;  
**(London):** Sheila A Fisher<sup>29</sup>, Alastair Forbes<sup>30</sup>, Cathryn M Lewis<sup>29</sup>, Clive M Onnie<sup>29</sup>, Natalie J Prescott<sup>29</sup>, Jeremy Sanderson<sup>31</sup>, Christopher G Mathew<sup>29</sup>; **(Newcastle):** Jamie Barbour<sup>32</sup>, M Khalid Mohiuddin<sup>32</sup>, Catherine E Todhunter<sup>32</sup>, John C Mansfield<sup>32</sup>; **(Oxford):** Tariq Ahmad<sup>33</sup>, Fraser R Cummings<sup>33</sup>, Derek P Jewell<sup>33</sup>

**Hypertension (Aberdeen):** John Webster<sup>34</sup>; **(Cambridge):** Morris J Brown<sup>35</sup>, David G Clayton<sup>4</sup>; **(Evry, France):** G Mark Lathrop<sup>36</sup>; **(Glasgow):** John Connell<sup>37</sup>, Anna Dominiczak<sup>37</sup>;  
**(Leicester):** Nilesh J Samani<sup>10</sup>; **(London):** Carolina A Braga Marcano<sup>38</sup>, Beverley Burke<sup>38</sup>, Richard Dobson<sup>38</sup>, Johannie Gungadoo<sup>38</sup>, Kate L Lee<sup>38</sup>, Patricia B Munroe<sup>38</sup>, Stephen J Newhouse<sup>38</sup>, Abiodun Onipinla<sup>38</sup>, Chris Wallace<sup>38</sup>, Mingzhan Xue<sup>38</sup>, Mark Caulfield<sup>38</sup>;  
**(Oxford):** Martin Farrall<sup>39</sup>

**Rheumatoid Arthritis:** Anne Barton<sup>40</sup>, Ian N Bruce<sup>40</sup>, Hannah Donovan<sup>40</sup>, Steve Eyre<sup>40</sup>, Paul D Gilbert<sup>40</sup>, Samantha L Hider<sup>40</sup>, Anne M Hinks<sup>40</sup>, Sally L John<sup>40</sup>, Catherine Potter<sup>40</sup>, Alan J Silman<sup>40</sup>, Deborah PM Symmons<sup>40</sup>, Wendy Thomson<sup>40</sup>, Jane Worthington<sup>40</sup>

**Type 1 Diabetes:** David G Clayton<sup>4</sup>, David B Dunger<sup>4,41</sup>, Sarah Nutland<sup>4</sup>, Helen E Stevens<sup>4</sup>, Neil M Walker<sup>4</sup>, Barry Widmer<sup>4,41</sup>, John A Todd<sup>4</sup>

**Type 2 Diabetes (Exeter):** Timothy M Frayling<sup>42,43</sup>, Rachel M Freathy<sup>42,43</sup>, Hana Lango<sup>42,43</sup>, John R B Perry<sup>42,43</sup>, Beverley M Shields<sup>43</sup>, Michael N Weedon<sup>42,43</sup>, Andrew T Hattersley<sup>42,43</sup>;  
**(London):** Graham A Hitman<sup>44</sup>; **(Newcastle):** Mark Walker<sup>45</sup>; **(Oxford):** Kate S Elliott<sup>2,8</sup>, Christopher J Groves<sup>8</sup>, Cecilia M Lindgren<sup>2,8</sup>, Nigel W Rayner<sup>2,8</sup>, Nicolas J Timpson<sup>2,46</sup>, Eleftheria Zeggini<sup>2,8</sup>, Mark I McCarthy<sup>2,8</sup>

**Ankylosing Spondylitis:** Linda A Bradbury<sup>48</sup>, Claire Farrar<sup>49</sup>, Jennifer J Pointon<sup>48</sup>, Paul Wordsworth<sup>49</sup>, Matthew A Brown<sup>48,49</sup>

**AutoImmune Thyroid Disease:** Jayne A Franklyn<sup>50</sup>, Joanne M Heward<sup>50</sup>, Matthew J Simmonds<sup>50</sup>, Stephen CL Gough<sup>50</sup>

**Breast Cancer:** Sheila Seal<sup>51</sup>, Michael R Stratton<sup>51,52</sup>, Nazneen Rahman<sup>51</sup>

**Multiple Sclerosis:** Maria Ban<sup>53</sup>, An Goris<sup>53</sup>, Stephen J Sawcer<sup>53</sup>, Alastair Compston<sup>53</sup>

**PIs:** David Bentley<sup>6,54</sup>, Matthew A Brown<sup>48,49</sup>, Lon R Cardon<sup>2</sup>, Mark Caulfield<sup>38</sup>, David G Clayton<sup>4</sup>, David AS Compston<sup>53</sup>, Nick Craddock<sup>23</sup>, Panos Deloukas<sup>6</sup>, Peter Donnelly<sup>2,11</sup>, Martin Farrall<sup>39</sup>, Stephen CL Gough<sup>50</sup>, Alistair S Hall<sup>26</sup>, Andrew T Hattersley<sup>42,43</sup>, Adrian VS Hill<sup>2</sup>, Dominic P Kwiatkowski<sup>2,6</sup>, Christopher G Mathew<sup>29</sup>, Mark I McCarthy<sup>2,8</sup>, Willem H.Ouwehand<sup>9</sup>, Miles Parkes<sup>27</sup>, Marcus Pembrey<sup>18,20</sup>, Nazneen Rahman<sup>51</sup>, Nilesh J Samani<sup>10</sup>, Michael R Stratton<sup>51,52</sup>, John A Todd<sup>4</sup>, Jane Worthington<sup>40</sup>

## Affiliation

1. MRC Laboratories, Fajara, The Gambia; 2. Wellcome Trust Centre for Human Genetics, University of Oxford, Roosevelt Drive, Oxford OX3 7BN, UK; 3. Genetic Epidemiology Group, Department of Health Sciences, University of Leicester, Adrian Building, University Road, Leicester, LE1 7RH, UK; 4. Juvenile Diabetes Research Foundation/Wellcome Trust Diabetes and Inflammation Laboratory, Department of Medical Genetics, Cambridge Institute for Medical Research, University of Cambridge, Wellcome Trust/MRC Building, Cambridge, CB2 0XY, UK; 5. Department of Psychological Medicine, Henry Wellcome Building, School of Medicine, Cardiff University, Heath Park, Cardiff CF14 4XN, UK; 6. The Wellcome Trust Sanger Institute, Wellcome Trust Genome Campus, Hinxton, Cambridge CB10 1SA, UK; 7. The Wellcome Trust,

Gibbs Building, 215 Euston Road, London NW1 2BE, UK; 8. Oxford Centre for Diabetes, Endocrinology and Medicine, University of Oxford, Churchill Hospital, Oxford, OX3 7LJ, UK; 9. Department of Haematology, University of Cambridge, and National Health Service Blood and Transplant, Cambridge Centre, Long Road, Cambridge, CB2 2PT, UK; 10. Department of Cardiovascular Sciences, University of Leicester, Glenfield Hospital, Groby Road, Leicester, LE3 9QP, UK; 11. Department of Statistics, University of Oxford, 11. South Parks Road, Oxford OX1 3TG, UK; 12. Cancer Research UK Genetic Epidemiology Unit, Strangeways Research Laboratory, Worts Causeway, Cambridge CB1 8RN, UK; 13. National Health Service Blood and Transplant, Sheffield Centre, Longley Lane, Sheffield S5 7JN, UK; 14. National Health Service Blood and Transplant, Brentwood Centre, Crescent Drive, Brentwood, CM15 8DP, UK; 15. The Welsh Blood Service, Ely Valley Road, Talbot Green, Pontyclun, CF72 9WB, UK; 16. The Scottish National Blood Transfusion Service, Ellen's Glen Road, Edinburgh, EH17 7QT, UK; 17. National Health Service Blood and Transplant, Southampton Centre, Coxford Road, Southampton, SO16 5AF, UK; 18. Avon Longitudinal Study of Parents and Children, University of Bristol, 24 Tyndall Avenue, Bristol, BS8 1TQ, UK; 19. Division of Community Health Services, St George's University of London, Cranmer Terrace, London SW17 0RE, UK; 20. Institute of Child Health, University College London, 30 Guilford St, London WC1N 1EH, UK; 21. University of Aberdeen, Institute of Medical Sciences, Foresterhill, Aberdeen, AB25 2ZD, UK; 22. Department of Psychiatry, Division of Neuroscience, Birmingham University, Birmingham, B15 2QZ, UK; 23. Department of Psychological Medicine, Henry Wellcome Building, School of Medicine, Cardiff University, Heath Park, Cardiff CF14 4XN, UK; 24. SGDP, The Institute of Psychiatry, King's College London, De Crespigny Park Denmark Hill London SE5 8AF, UK; 25. School of Neurology, Neurobiology and Psychiatry, Royal Victoria Infirmary, Queen Victoria Road, Newcastle upon Tyne, NE1 4LP, UK; 26. LIGHT and LIMM Research Institutes, Faculty of Medicine and Health, University of Leeds, Leeds, LS1 3EX, UK; 27. IBD Research Group, Addenbrooke's Hospital, University of Cambridge, Cambridge, CB2 2QQ, UK; 28. Gastrointestinal Unit, School of Molecular and Clinical Medicine, University of Edinburgh, Western General Hospital, Edinburgh EH4 2XU UK; 29. Department of Medical & Molecular Genetics, King's College London School of Medicine, 8th Floor Guy's Tower, Guy's Hospital, London, SE1 9RT, UK; 30. Institute for Digestive Diseases, University College London Hospitals Trust, London, NW1 2BU, UK; 31. Department of Gastroenterology, Guy's and St Thomas' NHS Foundation Trust, London, SE1 7EH, UK; 32. Department of Gastroenterology & Hepatology, University of Newcastle upon Tyne, Royal Victoria Infirmary, Newcastle upon Tyne, NE1 4LP, UK; 33. Gastroenterology Unit, Radcliffe Infirmary, University of Oxford, Oxford, OX2 6HE, UK; 34. Medicine and Therapeutics, Aberdeen Royal Infirmary, Foresterhill, Aberdeen, Grampian AB9 2ZB, UK; 35. Clinical Pharmacology Unit and the Diabetes and Inflammation Laboratory, University of Cambridge, Addenbrookes Hospital, Hills Road, Cambridge CB2 2QQ, UK; 36. Centre National de Genotypage, 2, Rue Gaston Cremieux, Evry, Paris 91057.; 37. BHF Glasgow Cardiovascular Research Centre, University of Glasgow, 126 University Place, Glasgow, G12 8TA, UK; 38. Clinical Pharmacology and Barts and The London Genome Centre, William Harvey Research Institute, Barts and The London, Queen Mary's School of Medicine, Charterhouse Square, London EC1M 6BQ, UK; 39. Cardiovascular Medicine, University of Oxford, Wellcome Trust Centre for Human Genetics, Roosevelt Drive, Oxford OX3 7BN, UK; 40. arc Epidemiology Research Unit, University of Manchester, Stopford Building, Oxford Rd, Manchester, M13 9PT, UK; 41. Department of Paediatrics, University of Cambridge, Addenbrooke's Hospital, Cambridge, CB2 2QQ, UK; 42. Genetics of Complex

Traits, Institute of Biomedical and Clinical Science, Peninsula Medical School, Magdalen Road, Exeter EX1 2LU UK; 43. Diabetes Genetics, Institute of Biomedical and Clinical Science, Peninsula Medical School, Barrack Road, Exeter EX2 5DU UK; 44. Centre for Diabetes and Metabolic Medicine, Barts and The London, Royal London Hospital, Whitechapel, London, E1 1BB UK; 45. Diabetes Research Group, School of Clinical Medical Sciences, Newcastle University, Framlington Place, Newcastle upon Tyne NE2 4HH, UK; 46. The MRC Centre for Causal Analyses in Translational Epidemiology, Bristol University, Canynge Hall, Whiteladies Rd, Bristol BS2 8PR, UK; 47. London School of Hygiene and Tropical Medicine, Keppel Street, London WC1E 7HT, UK. 48. Diamantina Institute for Cancer, Immunology and Metabolic Medicine, Princess Alexandra Hospital, University of Queensland, Woolloongabba, Qld 4102, Australia; 49. Botnar Research Centre, University of Oxford, Headington, Oxford OX3 7BN, UK; 50. Department of Medicine, Division of Medical Sciences, Institute of Biomedical Research, University of Birmingham, Edgbaston, Birmingham B15 2TT, UK; 51. Section of Cancer Genetics, Institute of Cancer Research, 15 Cotswold Road, Sutton, SM2 5NG, UK; 52. Cancer Genome Project, The Wellcome Trust Sanger Institute, Wellcome Trust Genome Campus, Hinxton, Cambridge CB10 1SA, UK; 53. Department of Clinical Neurosciences, University of Cambridge, Addenbrooke's Hospital, Hills Road, Cambridge CB2 2QQ, UK; 54. PRESENT ADDRESS: Illumina Cambridge, Chesterford Research Park, Little Chesterford, Nr Saffron Walden, Essex, CB10 1XL, UK.

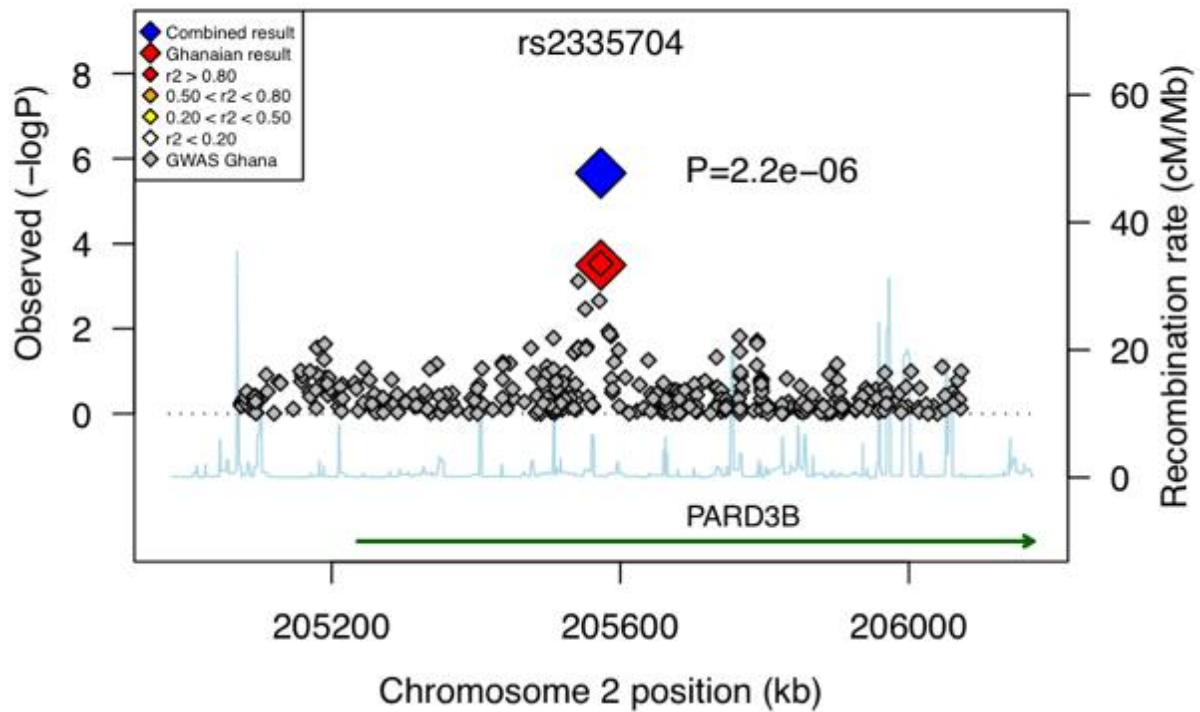

**Supplementary Figure 1.** Association plot of hits with fine mapping markers on chromosome 2 in the combined analysis ( $r^2$  values between rs2335704 and adjacent SNPs derived from the Ghanaian population uncorrected for  $\lambda_{GC}$ ).



**Supplementary Table 1.** Association statistics for the top 17 SNPs in the Ghana-Gambia analysis.

| Chr | SNP        | Position  | Major allele/<br>Minor allele | MAF  | <u>The Gambia GWA study</u> |                |        | <u>Ghana GWA study</u> |                |        | <u>Combined GWA study</u> |                |          | <u>Replication I</u> |                |       | <u>GWA study plus Replication I</u> |                |          |
|-----|------------|-----------|-------------------------------|------|-----------------------------|----------------|--------|------------------------|----------------|--------|---------------------------|----------------|----------|----------------------|----------------|-------|-------------------------------------|----------------|----------|
|     |            |           |                               |      | N                           | OR [95%CI]     | P      | N                      | OR [95%CI]     | P      | N                         | OR [95%CI]     | P        | N                    | OR [95%CI]     | P     | N                                   | OR [95%CI]     | P        |
| 1   | rs10493412 | 66855347  | G/C                           | 0.11 | 2655                        | 1.24 [1.1-1.4] | 0.005  | 2661                   | 1.36 [1.1-1.7] | 0.003  | 5317                      | 1.28 [1.1 1.4] | 5.58E-05 | 2432                 | 1.0 [0.8-1.2]  | 0.98  | 7775                                | 1.19 [1.1-1.3] | 0.002    |
| 1   | rs17436311 | 66856380  | A/G                           | 0.12 | 2665                        | 1.25 [1.1-1.5] | 0.004  | 2660                   | 1.35 [1.1-1.6] | 0.003  | 5326                      | 1.28 [1.1 1.4] | 5.17E-05 | 2367                 | 0.99 [0.8-1.2] | 0.94  | 7725                                | 1.19 [1.1-1.3] | 0.001    |
| 2   | rs10490534 | 154646176 | T/G                           | 0.42 | 2643                        | 1.18 [1.1-1.3] | 0.004  | 2660                   | 1.18 [1.1-1.3] | 0.006  | 5304                      | 1.18 [1.1 1.3] | 9.08E-05 | 2671                 | 0.94 [0.8-1.1] | 0.31  | 7998                                | 1.09 [1.0-1.2] | 0.01     |
| 2   | rs2335704  | 205573077 | A/C                           | 0.20 | 2683                        | 1.23 [1.1-1.4] | 0.003  | 2661                   | 1.27 [1.1-1.5] | 0.0004 | 5322                      | 1.26 [1.1 1.4] | 4.63E-06 | 2679                 | 1.19 [1.0-1.4] | 0.01  | 8023                                | 1.23 [1.1-1.3] | 3.00E-07 |
| 6   | rs7769812  | 38846812  | T/G                           | 0.21 | 2665                        | 0.82 [0.7-0.9] | 0.005  | 2654                   | 0.82 [0.7-0.9] | 0.005  | 5321                      | 0.82 [0.7 0.9] | 9.13E-05 | 2681                 | 1.0 [0.9-1.2]  | 0.97  | 8033                                | 0.87 [0.8-0.9] | 0.001    |
| 6   | rs4896905  | 147713687 | A/G                           | 0.12 | 2651                        | 0.76 [0.6-0.9] | 0.002  | 2660                   | 0.77 [0.6-0.9] | 0.006  | 5312                      | 0.76 [0.7 0.9] | 3.22E-05 | 2452                 | 0.99 [0.8-1.2] | 0.9   | 7788                                | 0.83 [0.7-0.9] | 5.10E-04 |
| 10  | rs1875148  | 61011997  | C/T                           | 0.13 | 2654                        | 1.28 [1.1-1.5] | 0.003  | 2660                   | 1.28 [1.1-1.5] | 0.003  | 5315                      | 1.29 [1.1 1.5] | 2.02E-05 | 2413                 | 0.95 [0.8-1.1] | 0.54  | 7755                                | 1.16 [1.1-1.3] | 0.003    |
| 11  | rs1503442  | 16382358  | T/C                           | 0.22 | 2650                        | 0.81 [0.7-0.9] | 0.004  | 2659                   | 0.82 [0.7-0.9] | 0.004  | 5311                      | 0.82 [0.7 0.9] | 4.78E-05 | 2683                 | 0.96 [0.8-1.1] | 0.54  | 8022                                | 0.88 [0.8-1.0] | 0.001    |
| 12  | rs11173067 | 58203089  | A/G                           | 0.27 | 2634                        | 0.84 [0.7-1.0] | 0.006  | 2660                   | 0.82 [0.7-0.9] | 0.003  | 5296                      | 0.83 [0.8 0.9] | 3.32E-05 | 2394                 | 1.11 [1.0-1.3] | 0.13  | 7721                                | 0.92 [0.9-1.0] | 0.033    |
| 16  | rs7190310  | 17179363  | A/G                           | 0.21 | 2662                        | 1.19 [1.0-1.4] | 0.0096 | 2657                   | 1.24 [1.1-1.4] | 0.003  | 5321                      | 1.21 [1.1 1.3] | 7.61E-05 | 2413                 | 0.94 [0.8-1.1] | 0.44  | 7766                                | 1.12 [1.0-1.2] | 0.009    |
| 16  | rs1353690  | 74576356  | C/A                           | 0.05 | 2667                        | 1.50 [1.2-1.9] | 0.002  | 2661                   | 1.49 [1.1-2.0] | 0.005  | 5329                      | 1.50 [1.2 1.8] | 1.83E-05 | 2454                 | 1.12 [0.8-1.5] | 0.47  | 7810                                | 1.40 [1.2-1.6] | 4.54E-05 |
| 18  | rs4331426  | 18444793  | A/G                           | 0.48 | 2686                        | 1.18 [1.1-1.3] | 0.003  | 2661                   | 1.19 [1.1-1.3] | 0.004  | 5323                      | 1.18 [1.1 1.3] | 2.20E-05 | 2685                 | 1.19 [1.1-1.3] | 0.003 | 8032                                | 1.19 [1.1-1.3] | 1.14E-07 |
| 18  | rs1943238  | 56266216  | C/A                           | 0.04 | 2651                        | 1.43 [1.1-1.9] | 0.006  | 2657                   | 1.72 [1.2-2.4] | 0.002  | 5309                      | 1.52 [1.2 1.9] | 8.70E-05 | 2662                 | 1.34 [1.0-1.9] | 0.07  | 8005                                | 1.41 [1.2-1.7] | 1.17E-04 |
| 18  | rs1943240  | 56267422  | G/A                           | 0.04 | 2664                        | 1.50 [1.2-1.9] | 0.001  | 2661                   | 1.79 [1.3-2.5] | 0.001  | 5326                      | 1.58 [1.3 1.9] | 8.39E-06 | 2684                 | 1.37 [1.0-1.9] | 0.04  | 8038                                | 1.47 [1.2-1.7] | 8.68E-06 |
| 18  | rs3937015  | 65750496  | C/T                           | 0.37 | 2662                        | 0.83 [0.7-0.9] | 0.001  | 2660                   | 0.84 [0.7-0.9] | 0.004  | 5323                      | 0.83 [0.8 0.9] | 1.17E-05 | 2659                 | 1.07 [0.9-1.2] | 0.28  | 8009                                | 0.90 [0.8-1.0] | 0.002    |
| 19  | rs35387445 | 59141468  | C/T                           | 0.06 | 2648                        | 1.42 [1.1-1.8] | 0.001  | 2659                   | 1.46 [1.1-1.9] | 0.003  | 5308                      | 1.41 [1.2 1.7] | 3.66E-05 | 2684                 | 1.05 [0.8-1.3] | 0.71  | 8020                                | 1.32 [1.1-1.5] | 7.80E-05 |
| 21  | rs9981165  | 22262330  | A/T                           | 0.04 | 2657                        | 0.73 [0.6-0.9] | 0.0096 | 2659                   | 0.48 [0.3-0.8] | 0.002  | 5319                      | 0.66 [0.5 0.8] | 9.06E-05 | 2451                 | 1.18 [0.8-1.7] | 0.41  | 7800                                | 0.78 [0.7-0.9] | 0.009    |

Chr, chromosome; Position, chromosomal position (bp); MAF, minor allele frequency; N, number of samples; OR, odds ratio; CI, confidence interval; P, P value calculated with logistic regression analyses adjusted for MDS components in the GWAS data sets and for gender and ethnicity in the replication analyses (uncorrected for  $\lambda_{GC}$  ).

**Supplementary Table 2.** Association statistics for additional SNPs genotyped in hit regions on chromosome 2 and 18.

|            | SNP,<br>allele of<br>minor<br>frequency | Combined data  |         | GWA study samples     |          |                            |          | Replication I         |          | Replication II        |          |                        |          | Trios/Duos     |          |
|------------|-----------------------------------------|----------------|---------|-----------------------|----------|----------------------------|----------|-----------------------|----------|-----------------------|----------|------------------------|----------|----------------|----------|
|            |                                         |                |         | Ghana<br>case/control |          | The Gambia<br>case/control |          | Ghana<br>case/control |          | Ghana<br>case/control |          | Malawi<br>case/control |          | Ghana          |          |
|            |                                         |                |         | OR [95%CI]            | <i>P</i> | OR [95%CI]                 | <i>P</i> | OR [95%CI]            | <i>P</i> | OR [95%CI]            | <i>P</i> | OR [95%CI]             | <i>P</i> | OR [95%CI]     | <i>P</i> |
| Chromosome | 2q33.2                                  |                |         |                       |          |                            |          |                       |          |                       |          |                        |          |                |          |
| GWA Study  | rs2335704,C                             | 1.19 [1.1-1.3] | 2.2E-06 | 1.28 [1.1-1.5]        | 0.0004   | 1.23 [1.1-1.4]             | 0.003    | 1.14 [1.0-1.4]        | 0.01     | 0.93 [0.7-1.3]        | 0.63     | 1.02 [0.8-1.4]         | 0.91     | 0.78 [0.6-1.0] | 0.08     |
| Additional | rs2335705,C                             | 1.17 [1.1-1.3] | 6.2E-05 | 1.32 [1.1-1.5]        | 0.0002   | 1.19 [1.0-1.4]             | 0.045    | 1.15 [1.0-1.3]        | 0.05     | 0.93 [0.7-1.3]        | 0.67     | 1.04 [0.8-1.4]         | 0.82     | 0.82 [0.6-1.1] | 0.16     |
|            |                                         |                |         |                       |          |                            |          |                       |          |                       |          |                        |          |                |          |
| Chromosome | 18q11.2                                 |                |         |                       |          |                            |          |                       |          |                       |          |                        |          |                |          |
| GWA Study  | rs4331426,G                             | 1.19 [1.1-1.3] | 6.8E-09 | 1.18 [1.1-0.3]        | 0.004    | 1.18 [1.1-1.3]             | 0.003    | 1.19 [1.1-1.3]        | 0.003    | 1.18 [0.9-1.5]        | 0.19     | 1.15 [0.9-1.4]         | 0.23     | 1.33 [1.1-1.7] | 0.016    |
| Additional | rs11874936,C                            | 1.17 [1.1-1.3] | 7.3E-07 | 1.21 [1.1-1.4]        | 0.001    | 1.11 [1.0-1.3]             | 0.14     | 1.21 [1.1-1.4]        | 0.001    | 1.20 [0.9-1.6]        | 0.15     | n.d.                   | n.d.     | 1.33 [1.0-1.7] | 0.019    |
| Additional | rs11877287,T                            | 1.18 [1.1-1.3] | 1.1E-07 | 1.20 [1.1-1.4]        | 0.002    | 1.12 [1.0-1.3]             | 0.073    | 1.18 [1.0-0.3]        | 0.005    | 1.14 [0.9-1.5]        | 0.32     | 1.40 [1.0-2.0]         | 0.045    | n.d.           | n.d.     |
| Additional | rs7231506, A                            | 0.85 [0.8-0.9] | 3.5E-07 | 0.84 [0.7-0.9]        | 0.002    | 0.90 [0.8-1.0]             | 0.11     | 0.86 [0.8-1.0]        | 0.009    | 0.81 [0.6-1.0]        | 0.09     | 0.83 [0.6-1.2]         | 0.31     | 0.69 [0.5-0.9] | 0.003    |

OR, odds ratio; CI, confidence interval; P, P value of logistic regression analyses adjusted by gender and ethnicity for GWA studies and replication I and II. P value of the family based data set was computed with the algorithm implemented in the UNPHASED

**Supplementary Table 3:** Association statistics of SNP rs2337504 in the overall study

| <b>rs2335704 – C allele</b>                      | <b>Controls</b> | <b>Controls</b> | <b>Cases</b> | <b>Cases</b> | <b>OR 95% CI</b> | <b>P value</b> |
|--------------------------------------------------|-----------------|-----------------|--------------|--------------|------------------|----------------|
| GWA study scan                                   | <i>N</i>        | <i>Freq</i>     | <i>N</i>     | <i>Freq</i>  |                  |                |
| Ghana                                            | 1740            | 0.192           | 921          | 0.232        | 1.28 (1.12-1.47) | 4.3E-04        |
| The Gambia (WTCCC)                               | 1378            | 0.172           | 1305         | 0.206        | 1.23 (1.07-1.42) | 3.2E-03        |
| Replication I                                    |                 |                 |              |              |                  |                |
| Ghana                                            | 1607            | 0.204           | 1072         | 0.230        | 1.19 (1.04-1.37) | 1.4E-02        |
| Replication II                                   |                 |                 |              |              |                  |                |
| Ghana                                            | 2200            | 0.202           | 149          | 0.188        | 0.92 (0.68-1.26) | 6.3E-01        |
| Malawi                                           | 524             | 0.163           | 187          | 0.166        | 1.02 (0.75-1.38) | 9.1E-01        |
| Combined analysis                                | 7449            |                 | 3634         |              | 1.29 (1.11-1.28) | 2.1E-06        |
| $\lambda_{GC}$ corrected combined <i>P</i> value |                 |                 |              |              |                  | 3.9E-06        |
| Ghanaian nuclear families*                       |                 |                 |              |              | 0.78 (0.60-1.03) | 8.2E-02        |

\* Cases from nuclear families were part of the Ghanaian GWA case-control study; the TDT statistic is not included in the combined analysis.

**Supplementary Table 4.** Association results of imputed SNPs of the Ghanaian, the Gambian and the combined samples.

| Chromosome | rs#        | Position  | Alleles | MAF  | Ghana |           |        | The Gambia |           |        | Ghana / The Gambia |           |          | Rsqr |
|------------|------------|-----------|---------|------|-------|-----------|--------|------------|-----------|--------|--------------------|-----------|----------|------|
|            |            |           |         |      | OR    | 95% CI    | P      | OR         | 95% CI    | P      | OR                 | 95% CI    | P        |      |
| 1          | rs10889630 | 66807377  | T/C     | 0.11 | 1.36  | 1.1 - 1.7 | 0.0029 | 1.26       | 1.1 - 1.5 | 0.0033 | 1.3                | 1.1 - 1.5 | 3.74E-05 | 0.89 |
| 1          | rs6699200  | 66813897  | C/T     | 0.11 | 1.36  | 1.1 - 1.7 | 0.0029 | 1.27       | 1.1 - 1.5 | 0.0029 | 1.3                | 1.1 - 1.5 | 3.28E-05 | 0.89 |
| 1          | rs4147266  | 66821331  | G/T     | 0.11 | 1.35  | 1.1 - 1.7 | 0.004  | 1.26       | 1.1 - 1.5 | 0.0037 | 1.29               | 1.1 - 1.5 | 5.58E-05 | 0.95 |
| 1          | rs12117202 | 66835157  | T/C     | 0.11 | 1.35  | 1.1 - 1.7 | 0.004  | 1.26       | 1.1 - 1.5 | 0.0037 | 1.29               | 1.1 - 1.5 | 5.54E-05 | 0.95 |
| 1          | rs11208921 | 66848642  | G/C     | 0.12 | 1.35  | 1.1 - 1.6 | 0.0034 | 1.24       | 1.1 - 1.5 | 0.005  | 1.28               | 1.1 - 1.4 | 6.81E-05 | 0.97 |
| 1          | rs12141816 | 66854606  | A/G     | 0.12 | 1.36  | 1.1 - 1.7 | 0.0028 | 1.25       | 1.1 - 1.5 | 0.005  | 1.28               | 1.1 - 1.4 | 5.73E-05 | 1    |
| 1          | rs324870   | 96576439  | C/T     | 0.04 | 0.63  | 0.5 - 0.9 | 0.0062 | 0.7        | 0.5 - 0.9 | 0.0084 | 0.66               | 0.5 - 0.8 | 1.00E-04 | 0.98 |
| 1          | rs2150037  | 106634119 | C/G     | 0.33 | 1.18  | 1 - 1.3   | 0.0082 | 1.19       | 1.1 - 1.3 | 0.0039 | 1.18               | 1.1 - 1.3 | 9.27E-05 | 0.77 |
| 1          | rs2210094  | 106635133 | C/G     | 0.33 | 1.18  | 1 - 1.3   | 0.0073 | 1.19       | 1.1 - 1.3 | 0.0038 | 1.18               | 1.1 - 1.3 | 7.77E-05 | 0.77 |
| 2          | rs6545883  | 61625761  | G/A     | 0.48 | 0.82  | 0.7 - 0.9 | 0.0008 | 0.85       | 0.8 - 0.9 | 0.0037 | 0.83               | 0.8 - 0.9 | 5.29E-06 | 1    |
| 2          | rs778753   | 61633704  | A/T     | 0.47 | 0.82  | 0.7 - 0.9 | 0.0009 | 0.86       | 0.8 - 1   | 0.007  | 0.84               | 0.8 - 0.9 | 1.16E-05 | 1    |
| 2          | rs778764   | 61639184  | T/C     | 0.44 | 0.84  | 0.7 - 0.9 | 0.0036 | 0.84       | 0.8 - 0.9 | 0.0023 | 0.84               | 0.8 - 0.9 | 1.25E-05 | 0.94 |
| 2          | rs13390761 | 205518183 | G/T     | 0.12 | 1.33  | 1.1 - 1.6 | 0.0016 | 1.26       | 1.1 - 1.5 | 0.0077 | 1.3                | 1.1 - 1.5 | 2.73E-05 | 0.74 |
| 2          | rs2335705  | 205572777 | C/A     | 0.17 | 1.33  | 1.2 - 1.5 | 0.0001 | 1.21       | 1 - 1.4   | 0.0089 | 1.27               | 1.1 - 1.4 | 4.59E-06 | 0.86 |
| 2          | rs12616462 | 212198517 | C/A     | 0.33 | 1.21  | 1.1 - 1.4 | 0.0019 | 1.18       | 1 - 1.3   | 0.0063 | 1.19               | 1.1 - 1.3 | 3.65E-05 | 0.96 |
| 3          | rs9823492  | 143893977 | G/A     | 0.14 | 0.79  | 0.7 - 0.9 | 0.0032 | 0.79       | 0.7 - 0.9 | 0.0077 | 0.78               | 0.7 - 0.9 | 2.98E-05 | 0.85 |
| 3          | rs6780978  | 163600044 | G/A     | 0.23 | 0.82  | 0.7 - 0.9 | 0.0044 | 0.83       | 0.7 - 0.9 | 0.0046 | 0.83               | 0.8 - 0.9 | 6.17E-05 | 0.82 |
| 4          | rs10005603 | 106063722 | G/T     | 0.35 | 0.82  | 0.7 - 0.9 | 0.0008 | 0.85       | 0.8 - 1   | 0.0066 | 0.83               | 0.8 - 0.9 | 7.23E-06 | 0.9  |
| 6          | rs2560812  | 13580621  | T/C     | 0.44 | 1.17  | 1 - 1.3   | 0.0085 | 1.23       | 1.1 - 1.4 | 0.0002 | 1.19               | 1.1 - 1.3 | 1.35E-05 | 0.82 |
| 6          | rs12211963 | 38875428  | C/T     | 0.23 | 0.82  | 0.7 - 0.9 | 0.0042 | 0.84       | 0.7 - 1   | 0.0086 | 0.83               | 0.8 - 0.9 | 9.14E-05 | 0.99 |
| 6          | rs6933055  | 43433771  | G/A     | 0.13 | 0.78  | 0.7 - 0.9 | 0.0032 | 0.77       | 0.7 - 0.9 | 0.0022 | 0.78               | 0.7 - 0.9 | 5.14E-05 | 0.91 |
| 6          | rs7750647  | 43467243  | T/C     | 0.13 | 0.77  | 0.7 - 0.9 | 0.0028 | 0.77       | 0.7 - 0.9 | 0.0021 | 0.78               | 0.7 - 0.9 | 4.45E-05 | 0.93 |
| 6          | rs175360   | 72448948  | T/C     | 0.16 | 1.23  | 1.1 - 1.4 | 0.0094 | 1.31       | 1.1 - 1.5 | 0.0005 | 1.26               | 1.1 - 1.4 | 2.10E-05 | 0.8  |
| 6          | rs17448801 | 87806344  | A/T     | 0.05 | 0.6   | 0.4 - 0.9 | 0.0039 | 0.73       | 0.6 - 0.9 | 0.0066 | 0.69               | 0.6 - 0.8 | 9.30E-05 | 0.98 |
| 6          | rs17448899 | 87807285  | G/A     | 0.05 | 0.6   | 0.4 - 0.9 | 0.0039 | 0.73       | 0.6 - 0.9 | 0.0066 | 0.69               | 0.6 - 0.8 | 9.30E-05 | 0.99 |
| 6          | rs17448940 | 87807562  | C/T     | 0.05 | 0.6   | 0.4 - 0.9 | 0.0039 | 0.73       | 0.6 - 0.9 | 0.0066 | 0.69               | 0.6 - 0.8 | 9.30E-05 | 0.98 |
| 6          | rs17546090 | 87807766  | C/A     | 0.05 | 0.6   | 0.4 - 0.9 | 0.0039 | 0.73       | 0.6 - 0.9 | 0.0066 | 0.69               | 0.6 - 0.8 | 9.30E-05 | 0.98 |
| 6          | rs9373523  | 147742826 | T/G     | 0.19 | 0.75  | 0.6 - 0.9 | 0.0002 | 0.8        | 0.7 - 0.9 | 0.0018 | 0.77               | 0.7 - 0.9 | 1.23E-06 | 0.7  |
| 7          | rs10267586 | 43021029  | C/T     | 0.18 | 1.25  | 1.1 - 1.4 | 0.0026 | 1.22       | 1.1 - 1.4 | 0.0057 | 1.23               | 1.1 - 1.4 | 5.61E-05 | 0.77 |
| 7          | rs7787531  | 128810833 | C/T     | 0.29 | 1.22  | 1.1 - 1.4 | 0.0022 | 1.22       | 1.1 - 1.4 | 0.0013 | 1.22               | 1.1 - 1.3 | 8.51E-06 | 0.86 |
| 8          | rs4873534  | 52350766  | A/G     | 0.39 | 0.84  | 0.7 - 1   | 0.0053 | 0.81       | 0.7 - 0.9 | 0.0002 | 0.84               | 0.8 - 0.9 | 1.17E-05 | 0.96 |
| 8          | rs16915954 | 52352025  | G/A     | 0.46 | 0.82  | 0.7 - 0.9 | 0.0008 | 0.85       | 0.8 - 0.9 | 0.0026 | 0.84               | 0.8 - 0.9 | 1.56E-05 | 0.96 |

**Supplementary Table 4** (continued)

| Chromosome | rs#        | Position  | Alleles | MAF  | Ghana |           |        | The Gambia |           |        | Ghana / The Gambia |           |          | Rsqr |
|------------|------------|-----------|---------|------|-------|-----------|--------|------------|-----------|--------|--------------------|-----------|----------|------|
|            |            |           |         |      | OR    | 95% CI    | P      | OR         | 95% CI    | P      | OR                 | 95% CI    | P        |      |
| 8          | rs7821565  | 52379315  | T/C     | 0.39 | 0.84  | 0.7 - 1   | 0.0053 | 0.81       | 0.7 - 0.9 | 0.0001 | 0.83               | 0.8 - 0.9 | 7.80E-06 | 0.97 |
| 8          | rs6986651  | 52381670  | G/A     | 0.39 | 0.85  | 0.8 - 1   | 0.0058 | 0.81       | 0.7 - 0.9 | 0.0001 | 0.83               | 0.8 - 0.9 | 8.45E-06 | 0.97 |
| 8          | rs7844531  | 52382184  | T/A     | 0.39 | 0.85  | 0.8 - 1   | 0.0058 | 0.81       | 0.7 - 0.9 | 0.0001 | 0.83               | 0.8 - 0.9 | 8.45E-06 | 0.97 |
| 8          | rs1837087  | 52389016  | G/T     | 0.4  | 0.85  | 0.8 - 1   | 0.008  | 0.81       | 0.7 - 0.9 | 0.0002 | 0.84               | 0.8 - 0.9 | 1.52E-05 | 0.95 |
| 8          | rs10110193 | 52389303  | C/T     | 0.4  | 0.85  | 0.8 - 1   | 0.008  | 0.81       | 0.7 - 0.9 | 0.0002 | 0.84               | 0.8 - 0.9 | 1.52E-05 | 0.95 |
| 8          | rs160441   | 90726108  | C/T     | 0.41 | 1.24  | 1.1 - 1.4 | 0.0003 | 1.17       | 1.1 - 1.3 | 0.0045 | 1.2                | 1.1 - 1.3 | 8.41E-06 | 0.98 |
| 9          | rs7019478  | 124105244 | C/A     | 0.2  | 0.82  | 0.7 - 0.9 | 0.0066 | 0.81       | 0.7 - 0.9 | 0.0036 | 0.82               | 0.7 - 0.9 | 8.02E-05 | 1    |
| 10         | rs10788068 | 122092412 | T/C     | 0.17 | 1.26  | 1.1 - 1.5 | 0.0031 | 1.23       | 1.1 - 1.4 | 0.004  | 1.24               | 1.1 - 1.4 | 5.43E-05 | 0.91 |
| 11         | rs7107287  | 13269545  | T/G     | 0.27 | 0.82  | 0.7 - 0.9 | 0.0058 | 0.85       | 0.8 - 1   | 0.006  | 0.84               | 0.8 - 0.9 | 9.40E-05 | 0.99 |
| 12         | rs11173018 | 58060297  | G/A     | 0.26 | 0.82  | 0.7 - 0.9 | 0.0041 | 0.83       | 0.7 - 0.9 | 0.0031 | 0.82               | 0.7 - 0.9 | 1.99E-05 | 0.77 |
| 12         | rs10877268 | 58062330  | C/A     | 0.25 | 0.83  | 0.7 - 0.9 | 0.0063 | 0.84       | 0.7 - 1   | 0.0086 | 0.83               | 0.8 - 0.9 | 8.54E-05 | 0.75 |
| 12         | rs10877301 | 58199293  | A/T     | 0.27 | 0.81  | 0.7 - 0.9 | 0.0027 | 0.85       | 0.7 - 1   | 0.0066 | 0.82               | 0.8 - 0.9 | 2.58E-05 | 0.98 |
| 12         | rs12369542 | 58204533  | C/T     | 0.27 | 0.81  | 0.7 - 0.9 | 0.0027 | 0.85       | 0.7 - 1   | 0.0066 | 0.82               | 0.8 - 0.9 | 2.58E-05 | 0.98 |
| 12         | rs2175950  | 58206649  | A/G     | 0.27 | 0.81  | 0.7 - 0.9 | 0.0025 | 0.84       | 0.7 - 0.9 | 0.0048 | 0.82               | 0.8 - 0.9 | 1.79E-05 | 0.95 |
| 12         | rs1146110  | 61985359  | G/A     | 0.07 | 1.34  | 1.1 - 1.7 | 0.0078 | 1.36       | 1.1 - 1.7 | 0.0029 | 1.35               | 1.2 - 1.6 | 6.62E-05 | 0.87 |
| 13         | rs1323565  | 75344483  | A/G     | 0.48 | 0.85  | 0.8 - 1   | 0.0054 | 0.85       | 0.8 - 0.9 | 0.0031 | 0.85               | 0.8 - 0.9 | 6.56E-05 | 0.85 |
| 13         | rs9544058  | 75345197  | T/C     | 0.48 | 0.85  | 0.8 - 1   | 0.005  | 0.85       | 0.8 - 0.9 | 0.0034 | 0.85               | 0.8 - 0.9 | 6.65E-05 | 0.85 |
| 13         | rs1323566  | 75349241  | A/G     | 0.48 | 0.85  | 0.8 - 0.9 | 0.0042 | 0.86       | 0.8 - 1   | 0.0058 | 0.85               | 0.8 - 0.9 | 8.28E-05 | 0.89 |
| 14         | rs9323270  | 54310799  | C/A     | 0.49 | 0.84  | 0.7 - 0.9 | 0.0045 | 1.18       | 1.1 - 1.3 | 0.0024 | 0.84               | 0.8 - 0.9 | 2.69E-05 | 0.75 |
| 14         | rs9323271  | 54311395  | C/G     | 0.49 | 0.84  | 0.7 - 0.9 | 0.0041 | 1.18       | 1.1 - 1.3 | 0.0024 | 0.84               | 0.8 - 0.9 | 2.56E-05 | 0.75 |
| 14         | rs12890882 | 68170371  | T/C     | 0.15 | 1.25  | 1.1 - 1.5 | 0.0063 | 1.28       | 1.1 - 1.5 | 0.0017 | 1.25               | 1.1 - 1.4 | 6.91E-05 | 0.95 |
| 14         | rs11624680 | 95096203  | G/A     | 0.37 | 0.8   | 0.7 - 0.9 | 0.0003 | 0.85       | 0.8 - 1   | 0.0047 | 0.83               | 0.8 - 0.9 | 1.13E-05 | 0.79 |
| 14         | rs8005962  | 95096906  | C/T     | 0.37 | 0.8   | 0.7 - 0.9 | 0.0002 | 0.85       | 0.8 - 0.9 | 0.004  | 0.83               | 0.8 - 0.9 | 8.33E-06 | 0.79 |
| 14         | rs2887395  | 95098967  | G/A     | 0.42 | 0.84  | 0.7 - 0.9 | 0.0035 | 0.84       | 0.8 - 0.9 | 0.0025 | 0.85               | 0.8 - 0.9 | 4.57E-05 | 0.83 |
| 14         | rs2369019  | 95099341  | G/A     | 0.42 | 0.84  | 0.8 - 0.9 | 0.0039 | 0.85       | 0.8 - 0.9 | 0.0033 | 0.85               | 0.8 - 0.9 | 6.81E-05 | 0.84 |
| 14         | rs7152619  | 95100195  | C/T     | 0.27 | 0.79  | 0.7 - 0.9 | 0.0002 | 0.82       | 0.7 - 0.9 | 0.0035 | 0.8                | 0.7 - 0.9 | 1.96E-06 | 0.83 |
| 14         | rs8014367  | 95100516  | T/C     | 0.25 | 0.79  | 0.7 - 0.9 | 0.0002 | 0.81       | 0.7 - 0.9 | 0.0018 | 0.8                | 0.7 - 0.9 | 1.15E-06 | 0.81 |
| 14         | rs9323929  | 95101710  | T/C     | 0.25 | 0.79  | 0.7 - 0.9 | 0.0002 | 0.8        | 0.7 - 0.9 | 0.0016 | 0.79               | 0.7 - 0.9 | 1.07E-06 | 0.82 |
| 14         | rs8011929  | 95119605  | T/C     | 0.25 | 0.84  | 0.7 - 1   | 0.0084 | 0.81       | 0.7 - 0.9 | 0.0019 | 0.83               | 0.8 - 0.9 | 4.43E-05 | 0.76 |
| 16         | rs1542421  | 17178445  | A/G     | 0.2  | 1.24  | 1.1 - 1.4 | 0.0032 | 1.22       | 1.1 - 1.4 | 0.003  | 1.22               | 1.1 - 1.3 | 5.43E-05 | 0.88 |
| 16         | rs7195149  | 17179490  | G/A     | 0.2  | 1.25  | 1.1 - 1.4 | 0.0025 | 1.21       | 1.1 - 1.4 | 0.0037 | 1.22               | 1.1 - 1.3 | 5.54E-05 | 0.89 |
| 16         | rs7197587  | 17179743  | A/G     | 0.2  | 1.24  | 1.1 - 1.4 | 0.0029 | 1.22       | 1.1 - 1.4 | 0.003  | 1.22               | 1.1 - 1.3 | 4.95E-05 | 0.89 |
| 16         | rs7197476  | 17180044  | C/T     | 0.2  | 1.24  | 1.1 - 1.4 | 0.0029 | 1.22       | 1.1 - 1.4 | 0.0027 | 1.22               | 1.1 - 1.3 | 4.46E-05 | 0.89 |
| 16         | rs7198185  | 17180061  | A/G     | 0.2  | 1.24  | 1.1 - 1.4 | 0.0029 | 1.22       | 1.1 - 1.4 | 0.003  | 1.22               | 1.1 - 1.3 | 5.05E-05 | 0.89 |

**Supplementary Table 4** (continued)

| Chromosome | rs#        | Position | Alleles | MAF  | The Ghana |           |        | The Gambia |           |        | Ghana / The Gambia |           |          | Rsqr |
|------------|------------|----------|---------|------|-----------|-----------|--------|------------|-----------|--------|--------------------|-----------|----------|------|
|            |            |          |         |      | OR        | 95% CI    | P      | OR         | 95% CI    | P      | OR                 | 95% CI    | P        |      |
| 16         | rs7198350  | 17180132 | A/T     | 0.2  | 1.25      | 1.1 - 1.4 | 0.0026 | 1.22       | 1.1 - 1.4 | 0.003  | 1.22               | 1.1 - 1.3 | 4.64E-05 | 0.89 |
| 16         | rs7205152  | 17183562 | T/C     | 0.11 | 1.38      | 1.2 - 1.7 | 0.0004 | 1.26       | 1.1 - 1.5 | 0.0071 | 1.31               | 1.2 - 1.5 | 2.33E-05 | 0.83 |
| 16         | rs11863514 | 17184792 | G/A     | 0.29 | 1.2       | 1.1 - 1.4 | 0.0054 | 1.21       | 1.1 - 1.4 | 0.002  | 1.2                | 1.1 - 1.3 | 5.10E-05 | 0.76 |
| 16         | rs1948632  | 74548947 | G/A     | 0.04 | 1.64      | 1.2 - 2.2 | 0.0006 | 1.48       | 1.1 - 1.9 | 0.0028 | 1.55               | 1.3 - 1.9 | 7.53E-06 | 0.92 |
| 16         | rs7196289  | 74552000 | A/G     | 0.04 | 1.62      | 1.2 - 2.2 | 0.0008 | 1.48       | 1.1 - 1.9 | 0.0028 | 1.54               | 1.3 - 1.9 | 9.17E-06 | 0.93 |
| 16         | rs904264   | 74569388 | C/T     | 0.05 | 1.5       | 1.1 - 2   | 0.0046 | 1.48       | 1.2 - 1.9 | 0.0013 | 1.5                | 1.3 - 1.8 | 1.14E-05 | 0.96 |
| 16         | rs904263   | 74569690 | A/G     | 0.04 | 1.57      | 1.2 - 2.1 | 0.0037 | 1.41       | 1.1 - 1.8 | 0.0061 | 1.48               | 1.2 - 1.8 | 5.43E-05 | 0.94 |
| 16         | rs7191424  | 74576951 | T/G     | 0.05 | 1.49      | 1.1 - 2   | 0.0047 | 1.48       | 1.2 - 1.9 | 0.0013 | 1.5                | 1.3 - 1.8 | 1.14E-05 | 0.97 |
| 16         | rs7184868  | 74577088 | G/C     | 0.05 | 1.49      | 1.1 - 2   | 0.0047 | 1.48       | 1.2 - 1.9 | 0.0013 | 1.5                | 1.3 - 1.8 | 1.14E-05 | 0.97 |
| 16         | rs12386026 | 81375092 | T/C     | 0.04 | 1.59      | 1.2 - 2   | 0.0003 | 1.75       | 1.2 - 2.6 | 0.0047 | 1.66               | 1.3 - 2   | 2.32E-06 | 0.77 |
| 17         | rs8082190  | 32822980 | T/C     | 0.05 | 1.53      | 1.2 - 2   | 0.0034 | 1.36       | 1.1 - 1.7 | 0.0068 | 1.44               | 1.2 - 1.7 | 5.16E-05 | 0.94 |
| 17         | rs712039   | 32924666 | C/T     | 0.49 | 1.21      | 1.1 - 1.4 | 0.001  | 0.85       | 0.8 - 0.9 | 0.0024 | 1.21               | 1.1 - 1.3 | 3.30E-06 | 0.9  |
| 17         | rs16976206 | 66243685 | C/T     | 0.35 | 0.83      | 0.7 - 0.9 | 0.0019 | 0.85       | 0.8 - 1   | 0.0053 | 0.84               | 0.8 - 0.9 | 2.15E-05 | 0.89 |
| 18         | rs11874936 | 18457951 | C/T     | 0.43 | 1.21      | 1.1 - 1.4 | 0.0012 | 1.17       | 1 - 1.3   | 0.0057 | 1.19               | 1.1 - 1.3 | 1.61E-05 | 0.96 |
| 18         | rs4257308  | 56260170 | C/T     | 0.04 | 1.7       | 1.2 - 2.3 | 0.0009 | 1.45       | 1.1 - 1.8 | 0.0022 | 1.55               | 1.3 - 1.9 | 5.56E-06 | 0.8  |
| 18         | rs7236588  | 56261863 | T/C     | 0.04 | 1.7       | 1.2 - 2.4 | 0.0031 | 1.49       | 1.2 - 1.9 | 0.0018 | 1.58               | 1.3 - 1.9 | 1.36E-05 | 0.99 |
| 18         | rs12970649 | 65756787 | C/T     | 0.43 | 0.85      | 0.8 - 1   | 0.0068 | 0.83       | 0.7 - 0.9 | 0.0007 | 0.84               | 0.8 - 0.9 | 1.87E-05 | 0.97 |
| 19         | rs1434579  | 49624812 | T/C     | 0.06 | 1.41      | 1.1 - 1.8 | 0.0045 | 1.52       | 1.2 - 1.9 | 0.0003 | 1.46               | 1.2 - 1.7 | 4.33E-06 | 0.94 |

Association results were filtered for those SNPs having a P value of < 0.01 in both studies and an imputation quality score of R-squared  $\geq 0.7$  as calculated by the MACH software. rs#, reference SNP number; Position, chromosomal position (bp); MAF, minor allele frequency of the combined Ghanaian and Gambian data set; OR, odds ratio; CI, 95% confidence interval; Rsqr, R-squared imputation quality value computed by the MACH software; P, P values calculated using logistic regression analysis adjusted by the first 3 MDS components for each, the Ghanaian and the Gambian study, and the first 6 MDS components for the combined data set.

**Supplementary Table 5.** Associations of the best SNPs in the present combined GWA studies of candidate genes previously found to associate with TB.

| Chr | Gene            | Size (kb) | No of SNPs | Best SNP ID | OR   | 95%CI     | P-value |
|-----|-----------------|-----------|------------|-------------|------|-----------|---------|
| 1   | <i>IL10</i>     | 4.9       | 21         | rs3024505   | 1.23 | 1.00-1.51 | 0.052   |
| 2   | <i>NRAMP1</i>   | 14.9      | 5          | rs11904786  | 1.18 | 0.96-1.44 | 0.119   |
| 3   | <i>PTX3</i>     | 6.8       | 19         | rs1014855   | 1.12 | 1.01-1.24 | 0.025   |
| 4   | <i>TLR2</i>     | 21.8      | 19         | rs10517578  | 1.19 | 0.98-1.44 | 0.082   |
| 5   | <i>IL12B</i>    | 15.7      | 21         | rs6874870   | 1.23 | 0.97-1.56 | 0.094   |
| 6   | <i>HLA-DQA1</i> | 6.2       | 9          | rs9469220   | 1.15 | 1.05-1.25 | 0.002   |
| 6   | <i>HLA-DRB1</i> | 11.0      | 5          | rs9272346   | 1.10 | 1.01-1.19 | 0.022   |
| 6   | <i>IFNGR1</i>   | 21.9      | 17         | rs9373180   | 1.57 | 1.16-2.13 | 0.004   |
| 6   | <i>TNF</i>      | 2.9       | 5          | rs1052248   | 0.96 | 0.87-1.06 | 0.401   |
| 10  | <i>MBL2</i>     | 6.3       | 32         | rs12573117  | 1.18 | 1.04-1.35 | 0.013   |
| 12  | <i>IFNG</i>     | 5.0       | 29         | rs2193047   | 1.09 | 1.00-1.18 | 0.038   |
| 12  | <i>VDR</i>      | 63.5      | 23         | rs11168312  | 0.86 | 0.72-1.02 | 0.082   |
| 15  | <i>UBE3A</i>    | 101.7     | 27         | rs7169070   | 1.12 | 0.96-1.30 | 0.158   |
| 16  | <i>NOD2</i>     | 35.9      | 16         | rs2066849   | 1.07 | 0.99-1.16 | 0.077   |
| 17  | <i>CCL18</i>    | 7.2       | 20         | rs1614133   | 1.11 | 1.02-1.19 | 0.012   |
| 17  | <i>MCPI</i>     | 1.9       | 19         | rs3917891   | 0.90 | 0.81-1.00 | 0.047   |
| 17  | <i>CCL4</i>     | 1.8       | 11         | rs1614133   | 1.11 | 1.02-1.19 | 0.012   |
| 17  | <i>NOS2A</i>    | 43.8      | 12         | rs3729508   | 0.90 | 0.81-1.00 | 0.042   |
| 17  | <i>STAT5B</i>   | 77.2      | 7          | rs9912576   | 1.05 | 0.96-1.14 | 0.283   |
| 19  | <i>CD209</i>    | 7.5       | 10         | rs11260030  | 0.93 | 0.84-1.03 | 0.164   |
| 19  | <i>IL12RB1</i>  | 27.3      | 4          | rs7255589   | 0.92 | 0.85-1.01 | 0.071   |
| 20  | <i>MC3R</i>     | 1.1       | 35         | rs6014657   | 0.88 | 0.79-0.97 | 0.012   |

Chr, chromosome; rs#, reference SNP number; OR, odds ratio; CI, confidence interval; P, uncorrected P values of the combined Ghanaian and Gambian association analysis using logistic regression tests.

## Supplementary Methods

### Ghanaian study group and population structure

TB patients were consecutively enrolled in Ghana, West Africa, between September 2001 and July 2004 at Korle Bu Teaching Hospital in Accra, Komfo Anokye Teaching Hospital in Kumasi, and at additional 15 hospitals and polyclinics in Accra and Kumasi and at regional district hospitals. The case group consisted of 2147 individuals with a median age of 32 years and a proportion of males of 66.7%. Phenotyping of patients included medical histories and documentation of major symptoms on structured questionnaires, physical examination, HIV-1/2 testing (Capillus, Trinity Biotech, Bray, Co Wicklow, Ireland), posterior-anterior chest X-rays, Ziehl-Neelsen staining of two independent sputum smears, and culturing of *M. tuberculosis* complex isolates on solid Loewenstein-Jensen medium. Cases were HIV-negative and had characteristic radiological lesions of pulmonary TB. All patients were treated in the framework of the DOTS programme (Directly Observed Treatment Short-Course strategy) organized by the Ghanaian National Tuberculosis Programme.

Out of 5565 control individuals that were included in the present study, 3551 were part of the primary Ghanaian TB study. Of those, 2546 persons were characterized by a medical history and clinical examination as well as posterior-anterior chest X-rays. An additional 1005 clinically healthy control individuals were phenotyped by medical history and clinical examination only. The age range of the 5565 control individuals was 5-76 years, with a median age of 28 years and a male proportion of 51.3%. An additional 2014 Ghanaian population controls were part of a control group recruited for a malaria association study in the Kumasi region. All individuals belonging to this group were children with a median age of 20 months and a proportion of males of 52.7%. Children of this group were healthy as assessed by physical examination.

To validate significant association results, 332 parent child trios/duos were collected for family based association tests. All affected children that were part of this group were added to the Ghanaian case group.

Study participants belonged to the ethnic groups of Akan, Ga-Adangbe, Ewe and several other ethnic groups from northern Ghana (Dagomba, Sissala, Gonja, and Kusasi; herein denoted as Northerners). The study protocol was approved by the Committee on Human Research, Publications and Ethics, School of Medical Sciences, Kwame Nkrumah University of Science



and Technology, Kumasi, Ghana, and the Ethics Committee of the Ghana Health Service, Accra, Ghana. Venous blood samples were taken only after a detailed explanation of the aims of the study, and consent was obtained of individuals enrolled or their parents/guardians by signature or by thumbprint in case of illiteracy.

### **Ghana GWA study; genotyping**

DNA was isolated from venous blood samples of study participants (AGOWA® mag Maxi DNA Isolation Kit, Macherey & Nagel, Germany) according to the manufacturer's instructions.

Genotyping was performed with the Affymetrix SNP 6.0 array at Affymetrix Services Laboratory (South San Francisco, CA 9408, USA) and ATLAS Biolabs GmbH (10117, Berlin, Germany). The genotype calling algorithm Birdseed (software v2) was applied on all samples.

### **Ghana GWA study; quality control**

All CEL files were subjected to a contrast QC analysis that judges the ability of an experiment to resolve SNP signals and assign them to the three genotype clusters. Fifteen samples yielded a contrast QC value below the recommended threshold of 0.4 for the Affymetrix SNP 6.0 array and were excluded from further analyses. Comparing annotated with computed sex identified 56 individuals with discordant results and results of these samples were removed from the data set. Eleven samples with an autosomal heterozygosity rate  $> 32\%$  or a genome-wide autosomal genotype missing fraction of  $> 5\%$  were excluded from further analysis.

Genetic outliers were eliminated by the nearest neighbour allele sharing algorithm of PLINK. A total of 49 individuals with  $Z < -3$  and 5 subjects with  $Z > 1$  were excluded from further analysis. Only one subject of related individuals was kept in the analyses (proportion of identity by descent  $\leq 0.125$ ). Two-hundred-sixty individuals of related pairs with the higher SNP missing frequencies were excluded. In total, 376 individuals were excluded from the data set resulting in 921 cases and 1740 controls.

### **The Gambian WTCCC GWA study; genotyping**

DNA for this study was whole-genome amplified using the GenomiPhi (GE Healthcare) technology by Geneservice (Cambridge, U.K.). Genotyping was performed with the Affymetrix GeneChip 500K arrays at the Affymetrix Services Laboratory (South San Francisco, CA 9408, USA). The CHIAMO algorithm was used for genotyping calling, which uses a Bayesian hierarchical four-class mixture model to call genotypes for all samples simultaneously. *A posteriori* estimates of the probability of the AA, AB and BB genotypes are calculated, together with a fourth, null genotype class. All CHIAMO genotypes analysed here were based on an *a posteriori* call probability threshold of 90%, which resulted in a discordance rate of 0.48 in this study, based on almost 50 million duplicate genotypes.

### **The Gambian WTCCC GWA study; quality control**

Of samples for which Affymetrix returned CEL files, a total of 396 samples were excluded from analysis. QC filters for call rate and heterozygosity were established via visual inspection of the sample genotype calls. A set of 202 samples were removed due to genome-wide call rates less than 92.5%. One sample with autosomal heterozygosity of less than 23% was removed from the analysis, together with six samples with autosomal heterozygosity greater than 32%. 'Identity-by-state' (IBS) between each pair of samples can be used to identify duplicates and related individuals. A total of 122 pairs of samples had IBS > 98% across 100,715 uncorrelated autosomal SNPs, and were taken here to be duplicates. For each pair, the sample with the lowest call rate was removed from the analysis. A further 54 pairs of samples had IBS > 85%, noticeably higher than would be expected between unrelated individuals. Again, the sample from each pair with the lowest call rate was removed from the analysis. Finally, IBS was also calculated between each sample from this study and 270 individuals from the International HapMap project. The IBS relationships were converted to distances, and projected onto two axes of multi-dimensional scaling. Based on this projection, 5 samples were removed from the analysis as a result of outlying ancestry.

**Supplementary Methods. Study populations; GWA and replication studies**

|                         | <b>Ghana</b> | <b>The Gambia</b> | <b>Malawi</b> | <b>Total</b> |
|-------------------------|--------------|-------------------|---------------|--------------|
| Scan cases              | 921          | 1316              |               | 2237         |
| Scan controls           | 1740         | 1382              |               | 3122         |
| Replication I cases     | 1076         |                   |               | 1076         |
| Replication I controls  | 1611         |                   |               | 1611         |
| Replication II cases    | 150          |                   | 236           | 386          |
| Replication II controls | 2214         |                   | 779           | 2993         |

*The scan genotyping platforms were Affymetrix SNP Array 6.0 (Ghana) and Affymetrix GeneChip 500k (The Gambia). Replication study genotyping platform was LightTyper for Ghanaian samples and Sequenom for The Gambian and Malawian samples. In total 11,425 samples were included in this study.*

**Supplementary Methods: Number of GWAS TB cases and controls; Ghanaian and Gambian ethnic groups.**

|               |             | TB-cases<br>N | Controls<br>N |
|---------------|-------------|---------------|---------------|
| Ghana         | Akan        | 620           | 1158          |
|               | Ga-Adangbe  | 132           | 155           |
|               | Ewe         | 58            | 78            |
|               | Northerners | 111           | 349           |
| The<br>Gambia | Wolloff     | 190           | 274           |
|               | Jola        | 190           | 264           |
|               | Fulani      | 434           | 424           |
|               | Mandinka    | 411           | 187           |
|               | Yoruba      | 91            | 233           |

### **The Gambia population structure**

IBS between each pair of samples was calculated across 100,715 uncorrelated autosomal SNPs passing QC filters. The IBS relationships were converted to distances and projected onto multi-dimensional scaling axes. The first three of these axes distinguish the four most common ethnic groups in the study and thus provide a basis for accounting for underlying population structure in the subsequent association analyses.

### **Malawian study group**

The population, basic field methods, and TB case finding and diagnostic procedures of the Karonga Prevention Study (Malawi study) have been described in detail elsewhere<sup>1-3</sup>. TB cases recruited into the study were ascertained largely by passive self-reporting at health centers. A small proportion of cases were identified in the context of other studies. Sputum samples and lymph node aspirates were examined (fluorescence and Ziehl-Neelsen stain) and cultured at project headquarters in Chilumba, with species confirmation by the United Kingdom Public Health Laboratory Service Mycobacterial Reference Unit (Dulwich, U.K.). Biopsy specimens were analysed at St. Thomas' Hospital, London, U.K. Inclusion in this study required confirmation of TB by culture, smear, or histology. The study protocol was reviewed and approved by the National Health Sciences Research Committee of Malawi and by the Ethics Committee of the London School of Hygiene and Tropical Medicine.

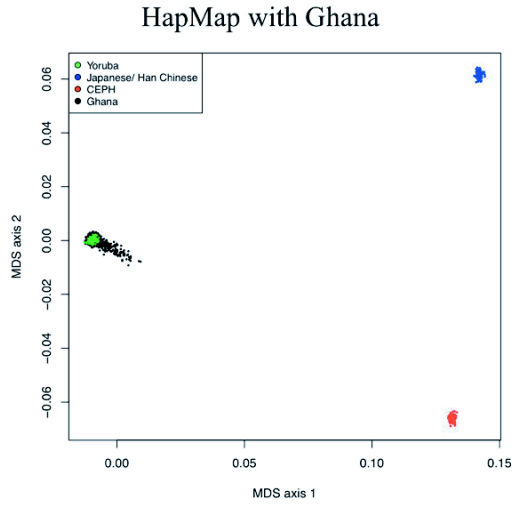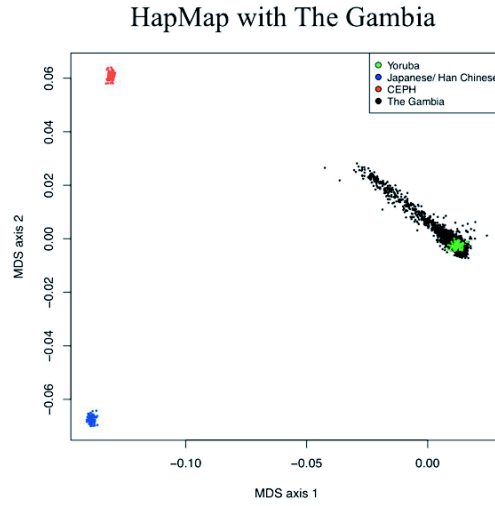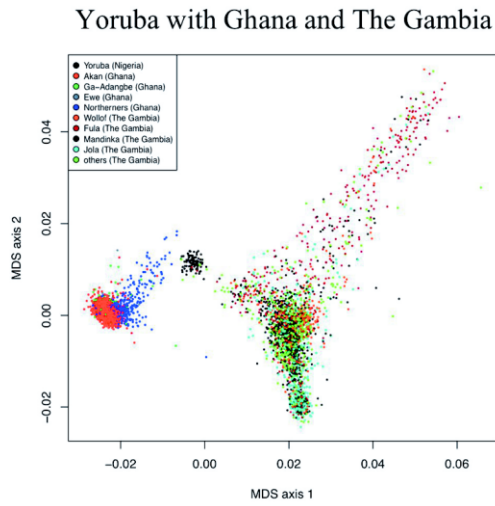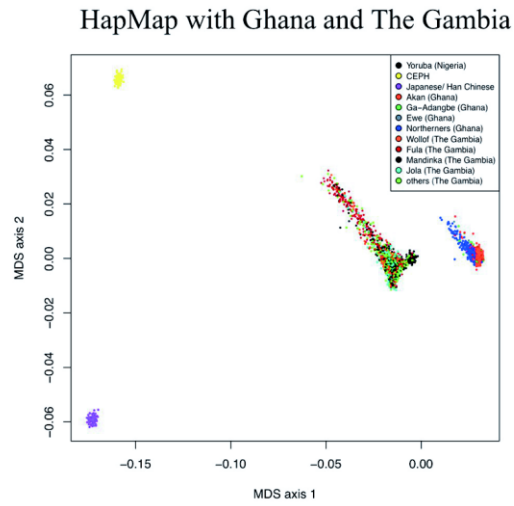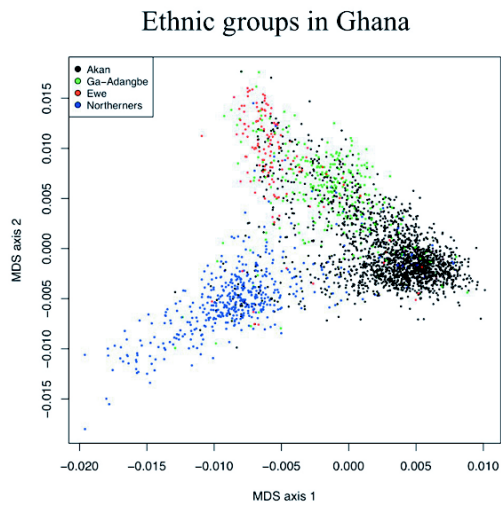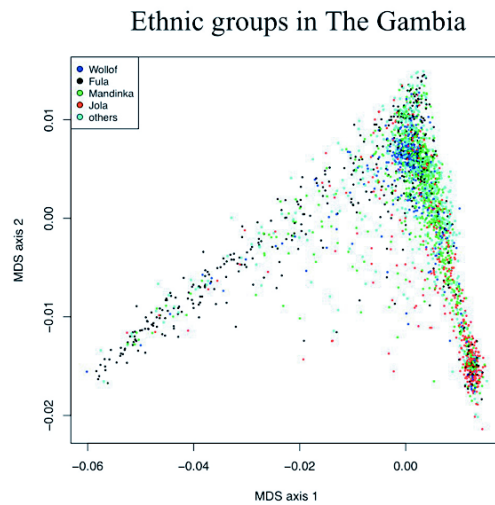

**Supplementary Methods:** *MDS plots of GWA study samples from Ghana and The Gambia.*  
*First panel; Multi-dimensional scaling (MDS) plots of GWA study samples from the Ghanaian,*

*The Gambian and HapMap populations. Second panel; Multi-dimensional scaling (MDS) plots of GWA study samples from Ghana and The Gambia, plotted with the HapMap samples; Third panel; MDS plot stratified according to self-reported ethnic groups*

### **SNP quality control of the Ghanaian and Gambian GWA study groups**

Quality metrics were applied for SNPs of both studies equally. SNPs of the Ghanaian and Gambian study groups with minor allele frequencies (MAF) < 1% and deviation from Hardy Weinberg Equilibrium (HWE) as defined by a P value <  $10^{-4}$  were removed from the combined and separated data sets. In addition, a SNP-wise genotyping rate < 98% was applied. From all SNPs that met these criteria and yielded association signals of <  $10^{-5}$  in the combined analysis, signal intensity plots were visually inspected to exclude SNPs with ambiguous or erroneous calling results.

Ghana, cases – rs4331426

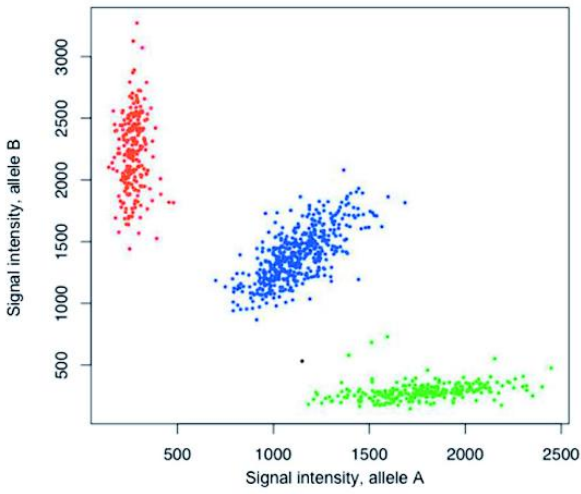

Ghana, controls – rs4331426

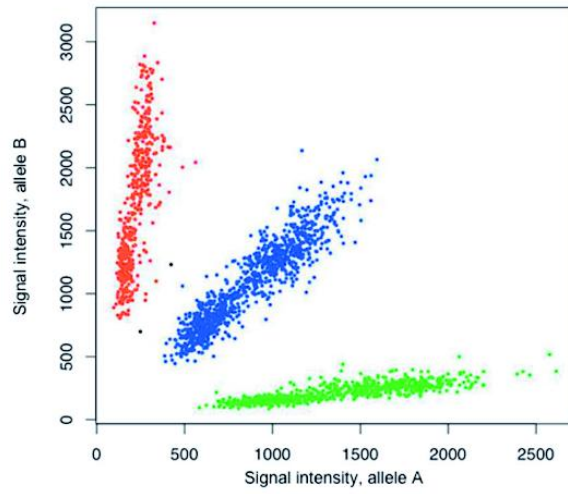

The Gambia, cases – rs4331426

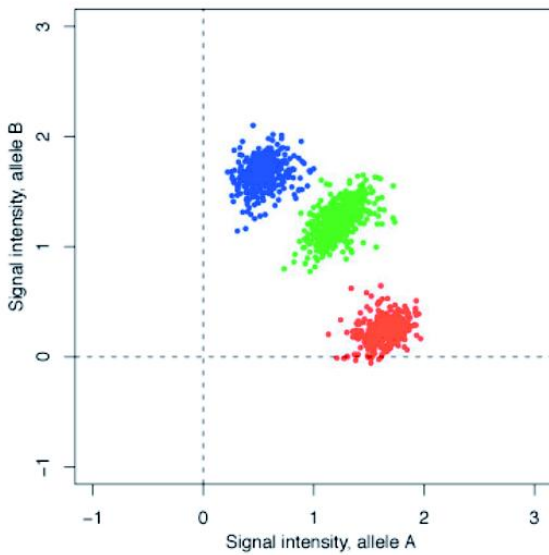

The Gambia, controls – rs4331426

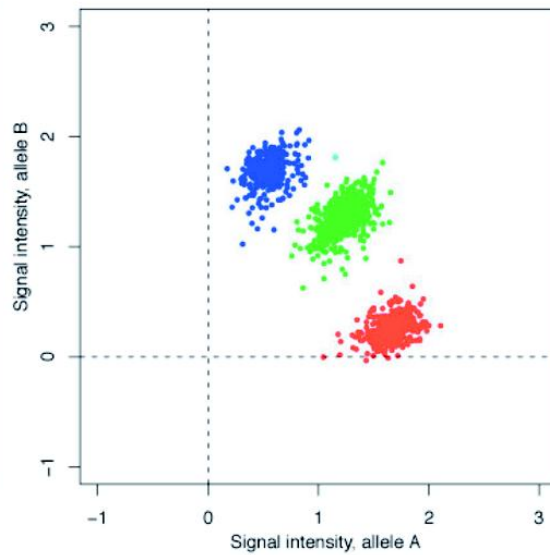

**Supplementary Methods:** *Cluster plots from the microarray genotyping of the Ghanaian and The Gambian samples for SNP rs4331426.*

Ghana, cases – rs2335704

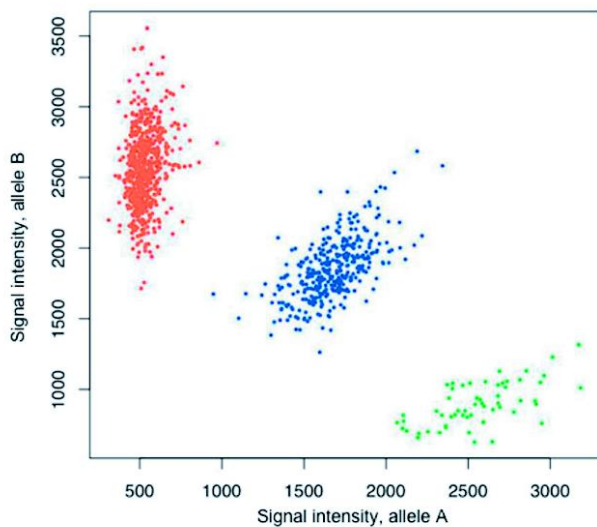

Ghana, controls – rs2335704

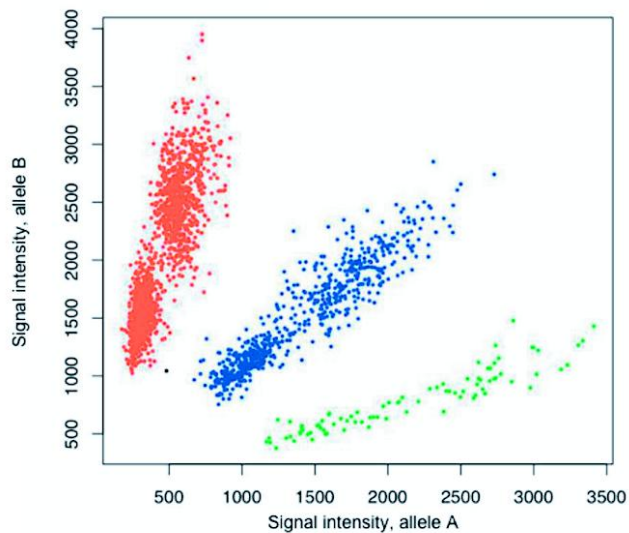

The Gambia, cases – rs2335704

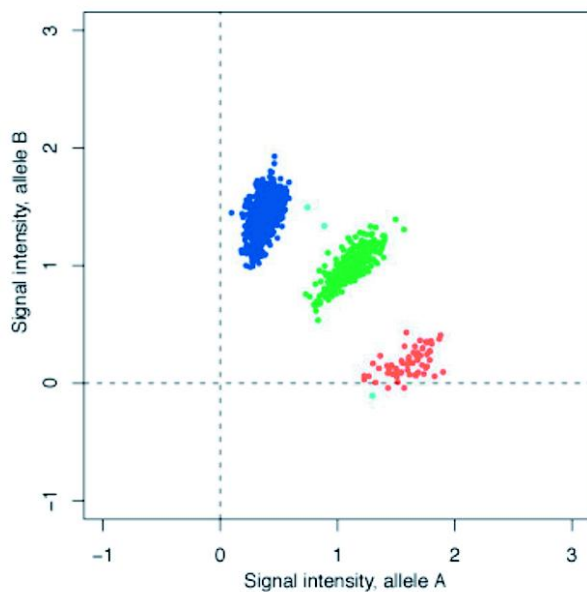

The Gambia, controls – rs2335704

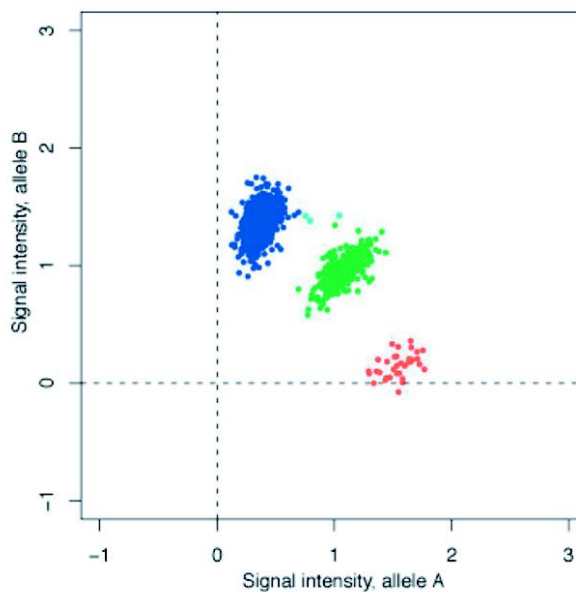

**Supplementary Methods:** Cluster plots from the microarray genotyping of the Ghanaian and Gambian samples for SNP rs2335704.



## **Sequenom genotyping**

Genotyping of the Malawi population was performed using the Sequenom system (Sequenom, San Diego, CA 92121-1331, USA) which uses mass spectrometry (MALDI-TOF) to discriminate products by their absolute masses. Genotyping was performed out at the Wellcome Trust Centre for Human Genetics Core Facility (Oxford, UK). Primer extension was carried out utilising a DNA primer adjacent to the SNP, and a specific reaction mix of polymerase, dNTPs and one ddNTP. Samples were analysed by MALDI-TOF mass spectrometry and the alleles were called by weight (in daltons) of the extension products.

## **LightTyper genotyping**

Genotyping of variants in the replication studies and, for confirmation, re-genotyping of the hit SNPs rs4331426 and rs2335704 in all samples was performed by dynamic allele specific hybridization with fluorescence resonance energy transfer (FRET) in a LightTyper device (Roche Diagnostics, Mannheim, Germany).

## **Statistical Analysis**

### *Association analyses*

Logistic regression analyses were performed to assess association of autosomal SNP genotypes with the disease status in Ghanaian and Gambian GWA study samples using PLINK v1.06. To control for population stratification, we inferred continuous axes of genetic variation by multidimensional scaling (MDS) and used them as covariates in logistic regression analyses. As strong linkage disequilibria (LD) may bias correct identification of MDS axes, a pruned set of SNPs were generated by removing one SNP of a pair with LD values ( $R^2$ ) > 0.2 within a window of 1500 SNPs and by discarding SNPs of 4 chromosomal regions with known strong LD (chr8:8000000..12000000, chr6:25000000..33500000, chr11:45000000..57000000, chr5:44000000..51500000). We applied the top six MDS coordinates in logistic regression analyses on the combined GWA studies and the top three MDS coordinates on each study

separately. Criteria for Replication I were P-values  $< 9.9 \times 10^{-3}$  in both GWA studies data sets, P-values of the combined data set  $< 9.9 \times 10^{-5}$ , and identical risk alleles. SNPs fulfilling these criteria were genotyped and statistically evaluated in an additional 2687 Ghanaian replication samples (Replication I). For those SNPs where a joint P-value  $< 5 \times 10^{-7}$  was determined in the combined results of the GWA studies and of Replication I, Replication II was performed in 2364 and 867 case-control samples of Ghanaian and Malawian ancestry, respectively. Statistical analyses of the replication stages and the entire data set including all 11425 samples were done by logistic regression tests adjusted for gender and ethnicity under an additive mode of inheritance and by Cochran Mantel Haenszel analyses stratified by ethnic groups. For each SNP that yielded significant replication results, Breslow Day statistics were performed to test for heterogeneity of genetic effects across ethnic groups. To assess the amount of between-study heterogeneity, the I-squared statistic was calculated with odds ratios and standard errors derived from the logistic regression analysis applying a fixed effect model. All statistical analyses on replication data were performed using STATA 10.0 (Stata Corporation, College Station, TX, USA). A likelihood based approach for association analyses of nuclear families implemented in the software UNPHASED v3.1.3 was applied on genotype data of the 332 Ghanaian parent child duos and trios in order to detect allelic transmission distortion in those SNPs that yielded significant association results.

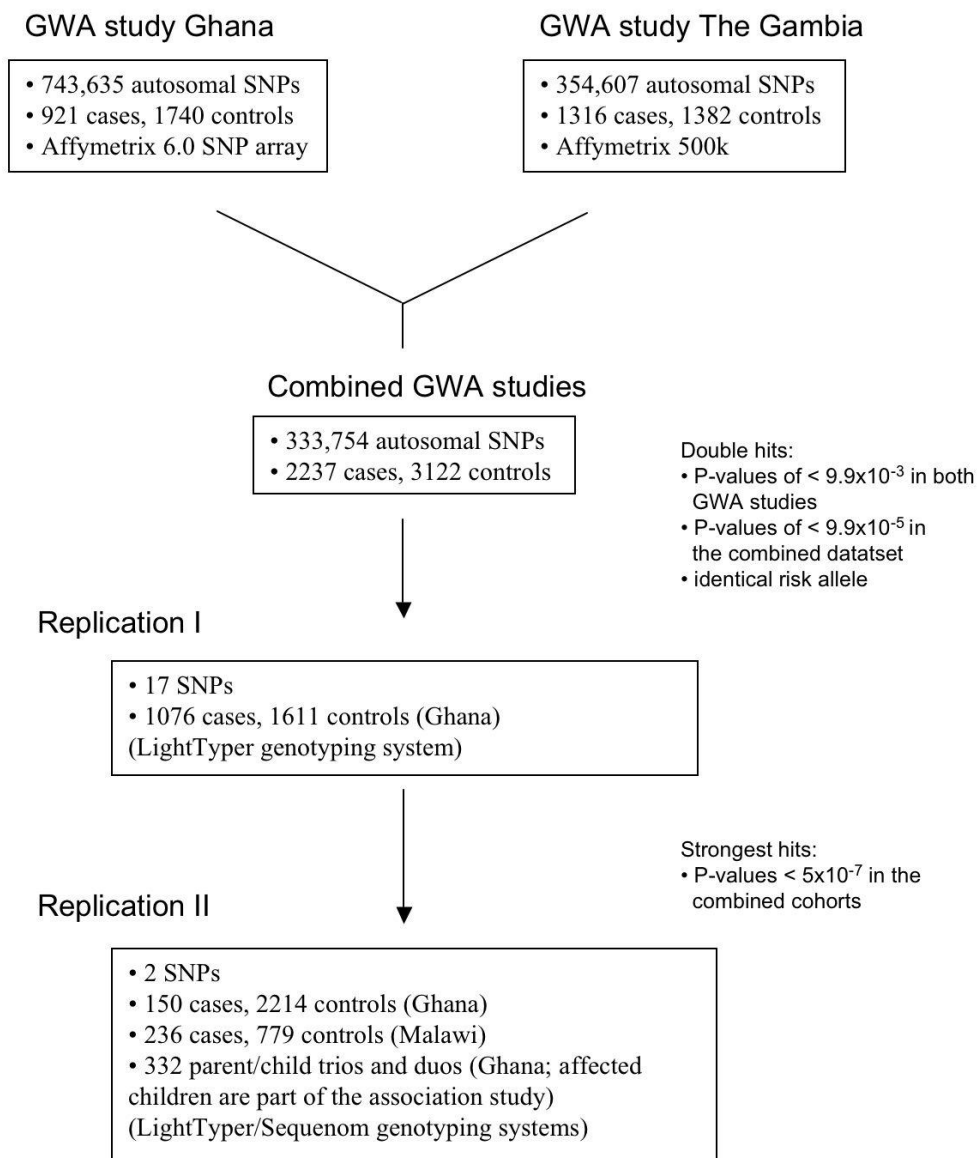

**Supplementary Methods:** *Study design heuristic of the combined analysis of the Ghanaian and Gambian GWA studies and the replication studies.*

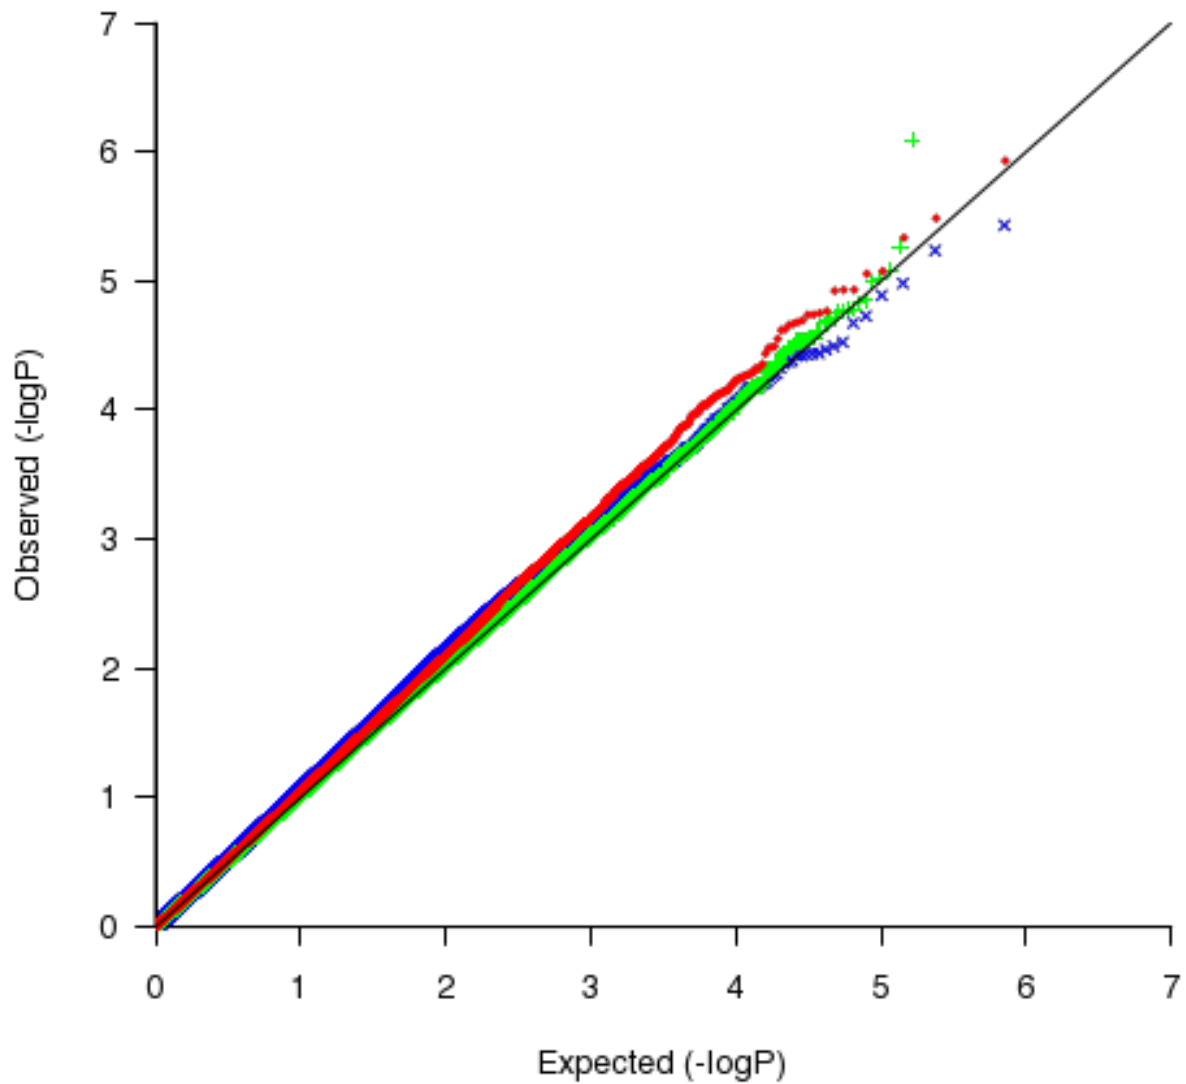

**Supplementary Methods:** *Quantile-quantile plot of the Ghanaian (green, lambda factor  $\lambda = 1.02$ ), the Gambian (blue,  $\lambda = 1.07$ ) and the combined GWA studies (red,  $\lambda = 1.05$ ); association statistics corrected for the first three (Ghana, The Gambia) or six (combined studies) multidimensional scaling components.*

### *Imputation and fine mapping experiments*

In order to identify additional associated SNPs close to the hits on chromosomes 2 and 18 (rs2335704, rs4331426) and on a genome-wide scale, we imputed SNPs of the Yoruban (YRI) HapMap reference sample (release 22) into the combined Ghanaian and Gambian data set. Imputation accuracy of the West African populations was assessed by masking 2% of the actual Ghanaian and Gambian genotypes for all chromosomes and the hidden genotypes were then re-imputed based on the YRI reference panel. We performed genome wide imputation analyses, applying stringent criteria for selecting only those imputed SNPs with high quality score ( $R_{sq} > 0.7$ ) for further association analyses, as the mean imputation genotype error rate across all chromosomes for the combined Ghanaian and Gambian sample were 8.2%.

SNPs were selected for fine typing experiments when LDs between imputed SNPs and the hit SNP were in strong LD and the imputed SNPs yielded similar association results to that of the hit SNP rs4331426. Imputation analyses were calculated with the MACH software (version 1.0.16;  $r^2$  indicated as  $R_{sq}$ ; <http://www.sph.umich.edu/csg/abecasis/MaCH/index.html>).

*Fixation index*

The Fixation index ( $F_{st}$ ) was calculated on the LD pruned data set including only those SNPs having weak LDs with a SNP in 1500 kb windows ( $r^2 < 0.2$ ). Known high LD regions were excluded as well and  $F_{st}$  values were computed with the EIGENSOFT software package (version 3.0; available at <http://genenath.med.harvard.edu/~reich/Software.htm>).

**Supplementary Methods:** *Pair-wise  $F_{st}$  values for comparisons of Ghanaian, Gambian and Yoruban (Nigeria) ethnic groups.*

|             | Ghana |            |       |             | The Gambia |       |        |          | Nigeria |
|-------------|-------|------------|-------|-------------|------------|-------|--------|----------|---------|
|             | Akan  | Ga-Adangbe | Ewe   | Northerners | Woloff     | Jola  | Fulani | Mandinka | Yoruba  |
| Akan        | 0     | 0          | 0.001 | 0.001       | 0.006      | 0.007 | 0.006  | 0.005    | 0.004   |
| Ga-Adangbe  |       | 0          | 0     | 0.001       | 0.006      | 0.007 | 0.006  | 0.005    | 0.003   |
| Ewe         |       |            | 0     | 0.001       | 0.006      | 0.007 | 0.007  | 0.006    | 0.003   |
| Northerners |       |            |       | 0           | 0.004      | 0.005 | 0.005  | 0.004    | 0.003   |
| Woloff      |       |            |       |             | 0          | 0.001 | 0.001  | 0        | 0.008   |
| Jola        |       |            |       |             |            | 0     | 0.002  | 0.001    | 0.009   |
| Fulani      |       |            |       |             |            |       | 0      | 0.001    | 0.009   |
| Mandinka    |       |            |       |             |            |       |        | 0        | 0.008   |
| Yoruba      |       |            |       |             |            |       |        |          | 0       |

**Supplementary Methods:** *Pair-wise  $F_{st}$  values for comparisons of Ghanaian, Gambian and Yoruban (Nigeria) populations.*

|                  | Ghana | The Gambia | Nigeria (Yoruba) |
|------------------|-------|------------|------------------|
| Ghana            | 0     | 0.005      | 0.003            |
| The Gambia       |       | 0          | 0.008            |
| Nigeria (Yoruba) |       |            | 0                |

### *Power Calculations*

Power calculations were performed for the combined Ghanaian and Gambian GWA study groups with the CaTS software (<http://www.sph.umich.edu/csg/abecasis/CaTS/>). An additive model was assumed with a TB prevalence of 0.003, 20 % disease allele frequency, a genotype relative risk of 1.4 and  $P$  value level of  $5 \times 10^{-8}$ . Applying the CaTS software on 2237 TB cases and 3122 controls resulted in 90% power to detect existing effects.

### **Supplementary References**

- S1. Bennett S, Lienhardt C, Bah-Sow O, Gustafson P, Manneh K, et al. (2002) Investigation of environmental and host-related risk factors for tuberculosis in Africa. II. Investigation of host genetic factors. *Am J Epidemiol* 155: 1074-1079.
- S2. Fitness J, Floyd S, Warndorff DK, Sichali L, Malema S, et al. (2004) Large-scale candidate gene study of tuberculosis susceptibility in the Karonga district of northern Malawi. *Am J Trop Med Hyg* 71: 341-349.
- S3. Lienhardt C, Bennett S, Del Prete G, Bah-Sow O, Newport M, et al. (2002) Investigation of environmental and host-related risk factors for tuberculosis in Africa. I. Methodological aspects of a combined design. *Am J Epidemiol* 155: 1066-1073.
